# Supplementary material for: Synthesis with Perfect Atom Economy: Generation of Furan Derivatives by 1,3-Dipolar Cycloaddition of Acetylenedicarboxylates at Cyclooctynes
Source: MDPI journal article supplement (doi:10.3390/molecules190914022), 2014-09-05

# Supplementary Materials

Figure S1.  $^1\text{H}$  NMR spectrum of **3b**.

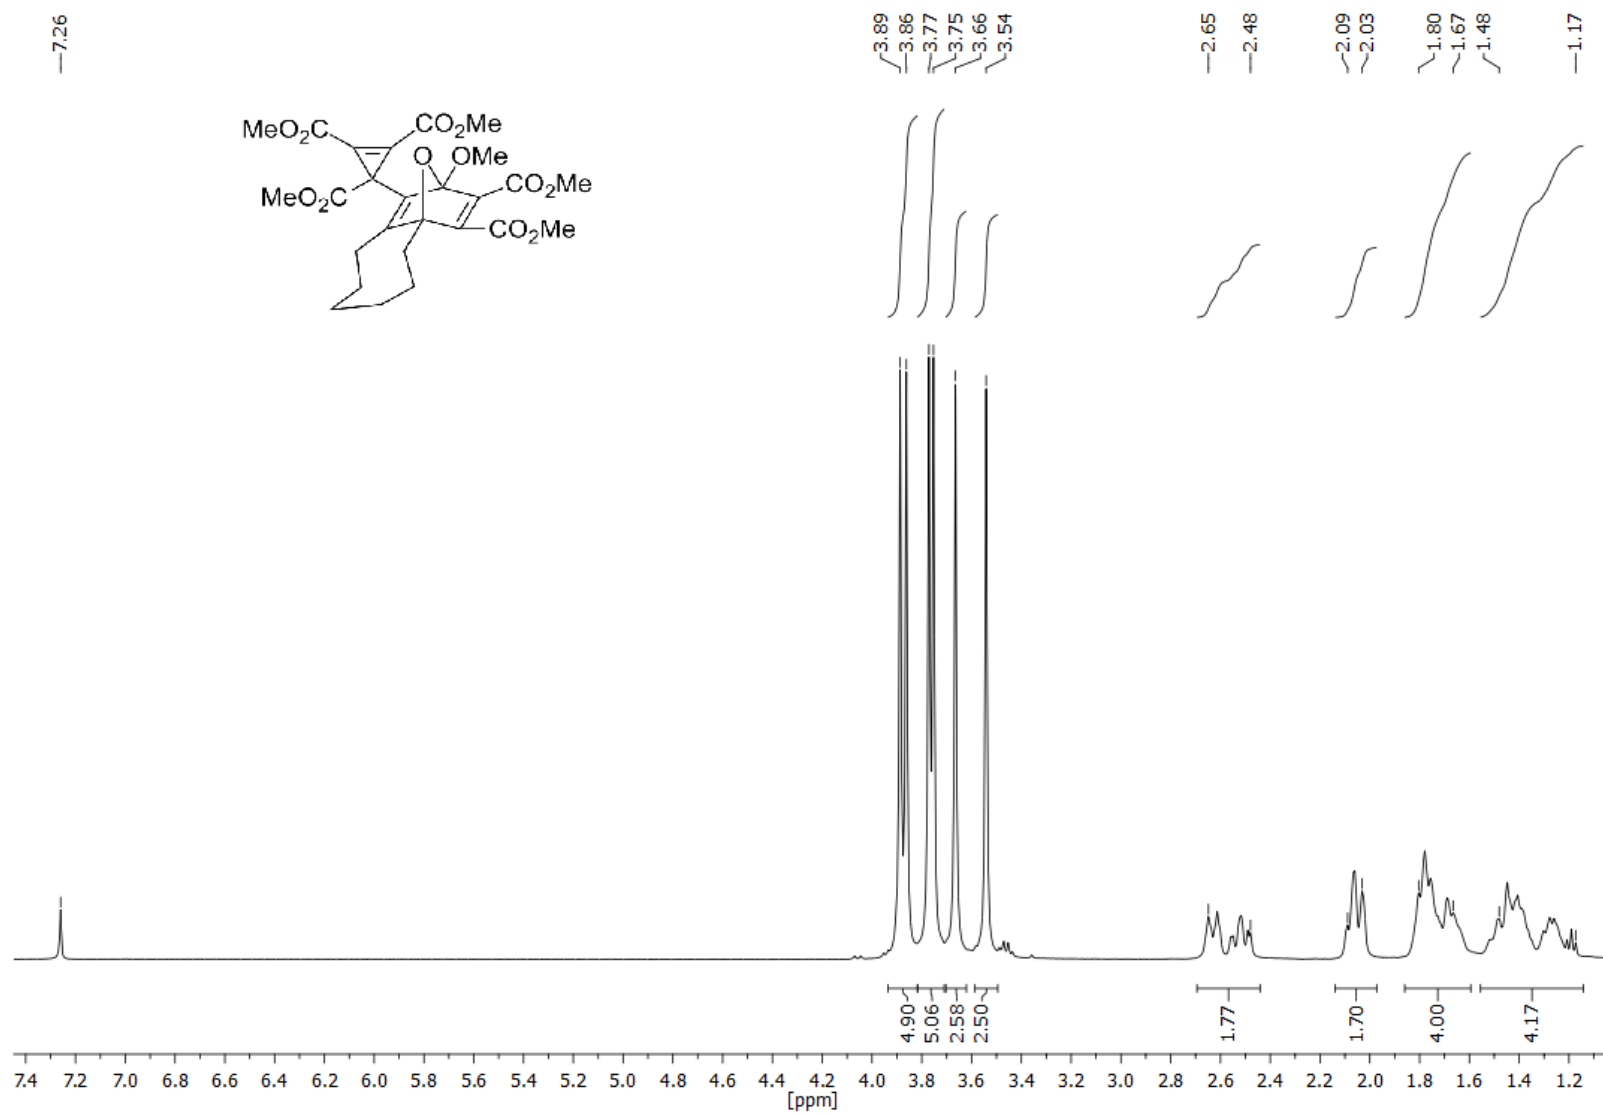

Figure S2.  $^{13}\text{C}$  NMR spectrum of **3b**.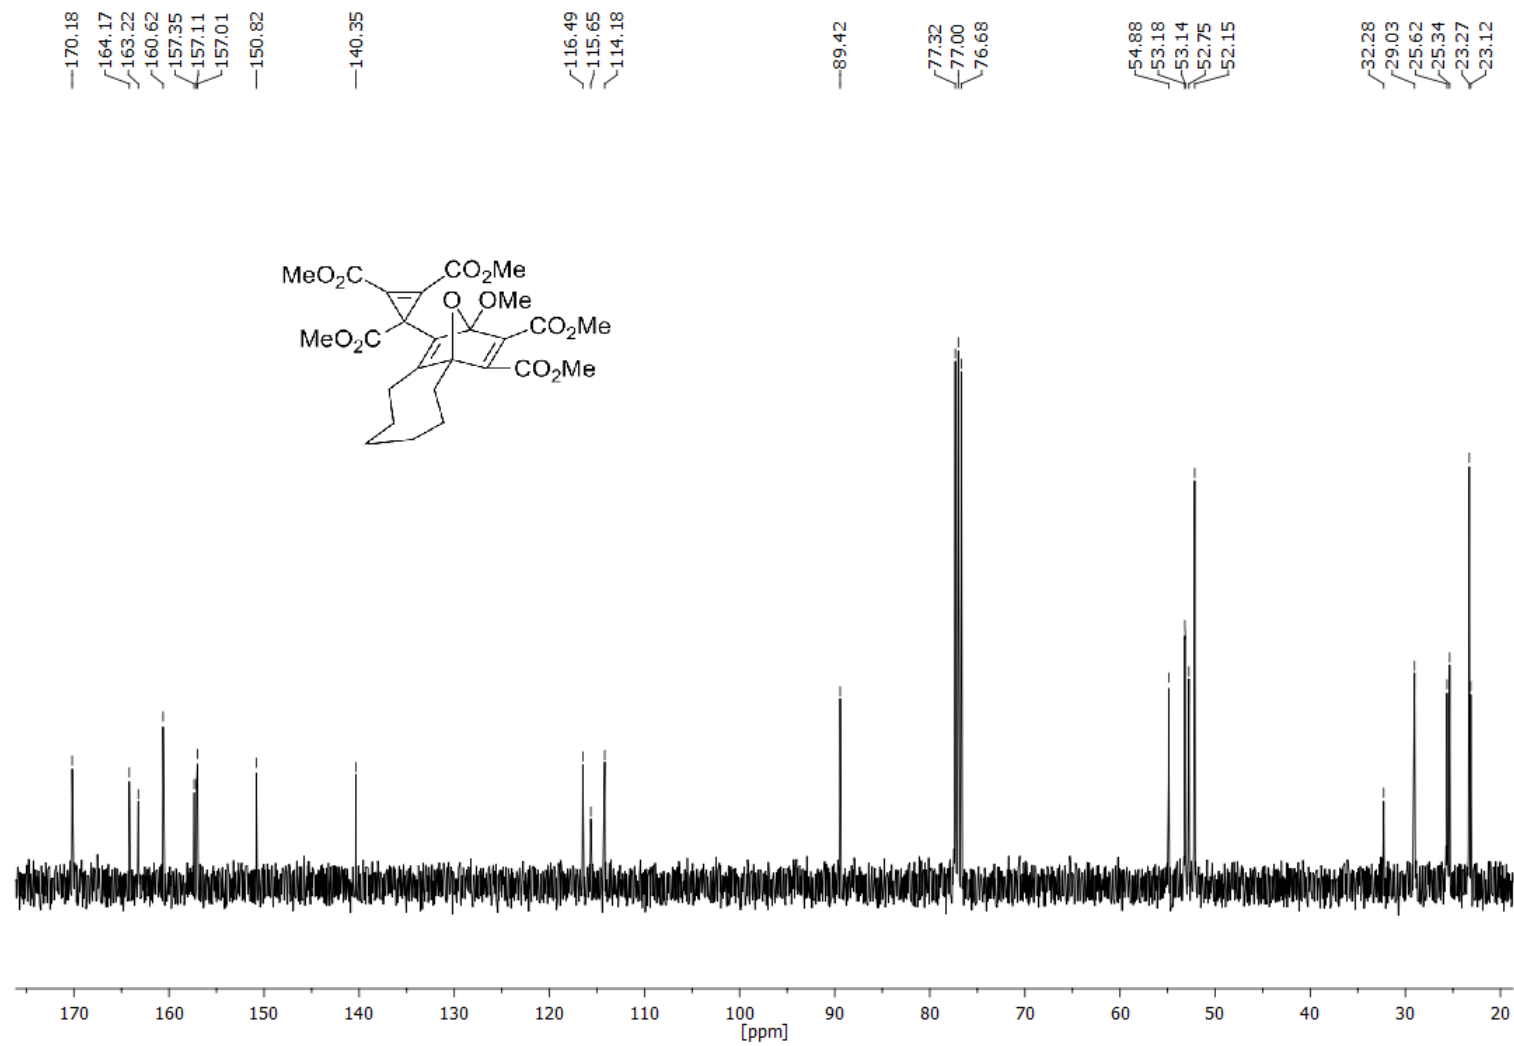

Figure S3.  $^1\text{H-NMR}$  spectrum of **3c**.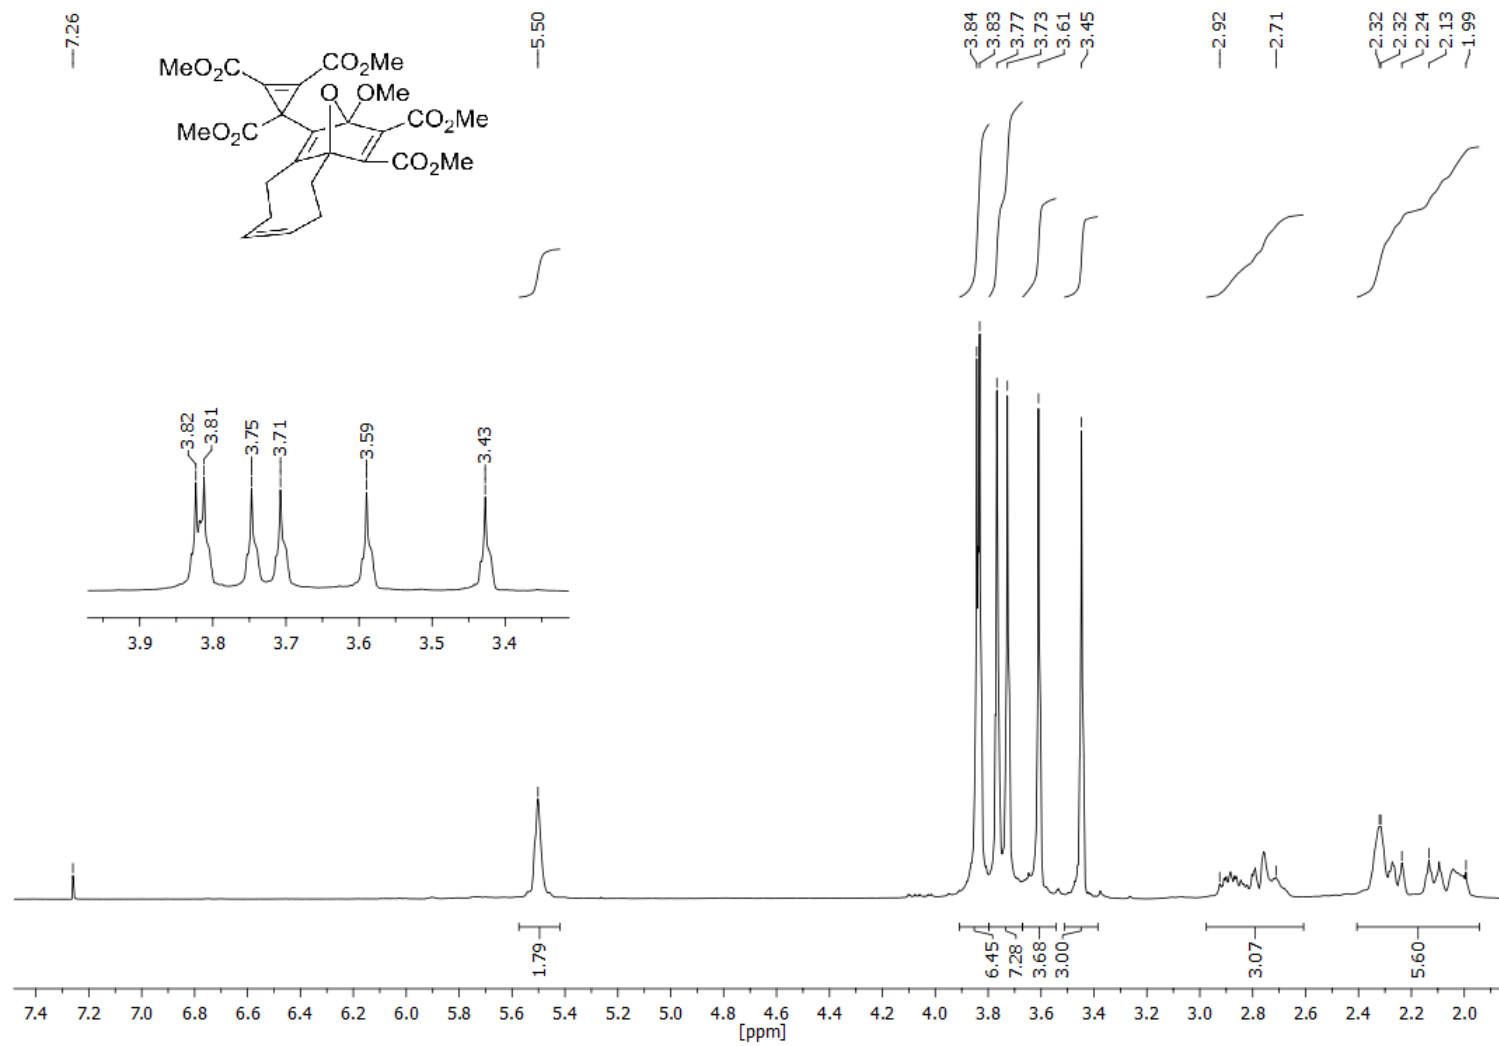

Figure S4.  $^{13}\text{C}$  NMR spectrum of **3c**.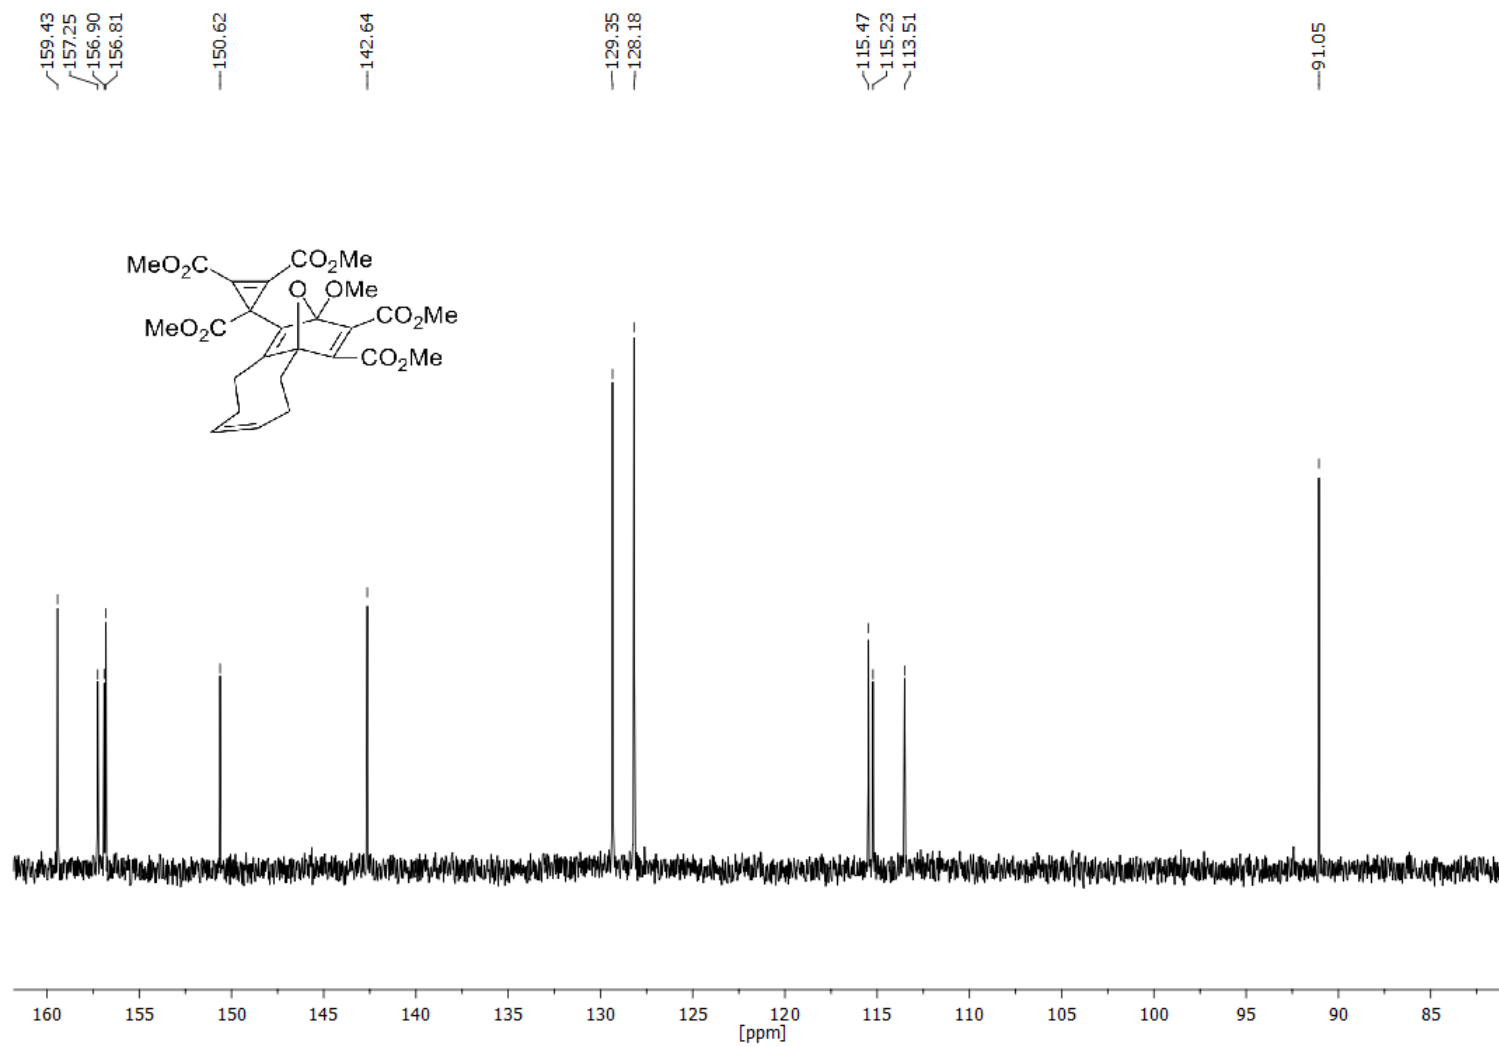

Figure S5.  $^1\text{H}$  NMR spectrum of **3d**.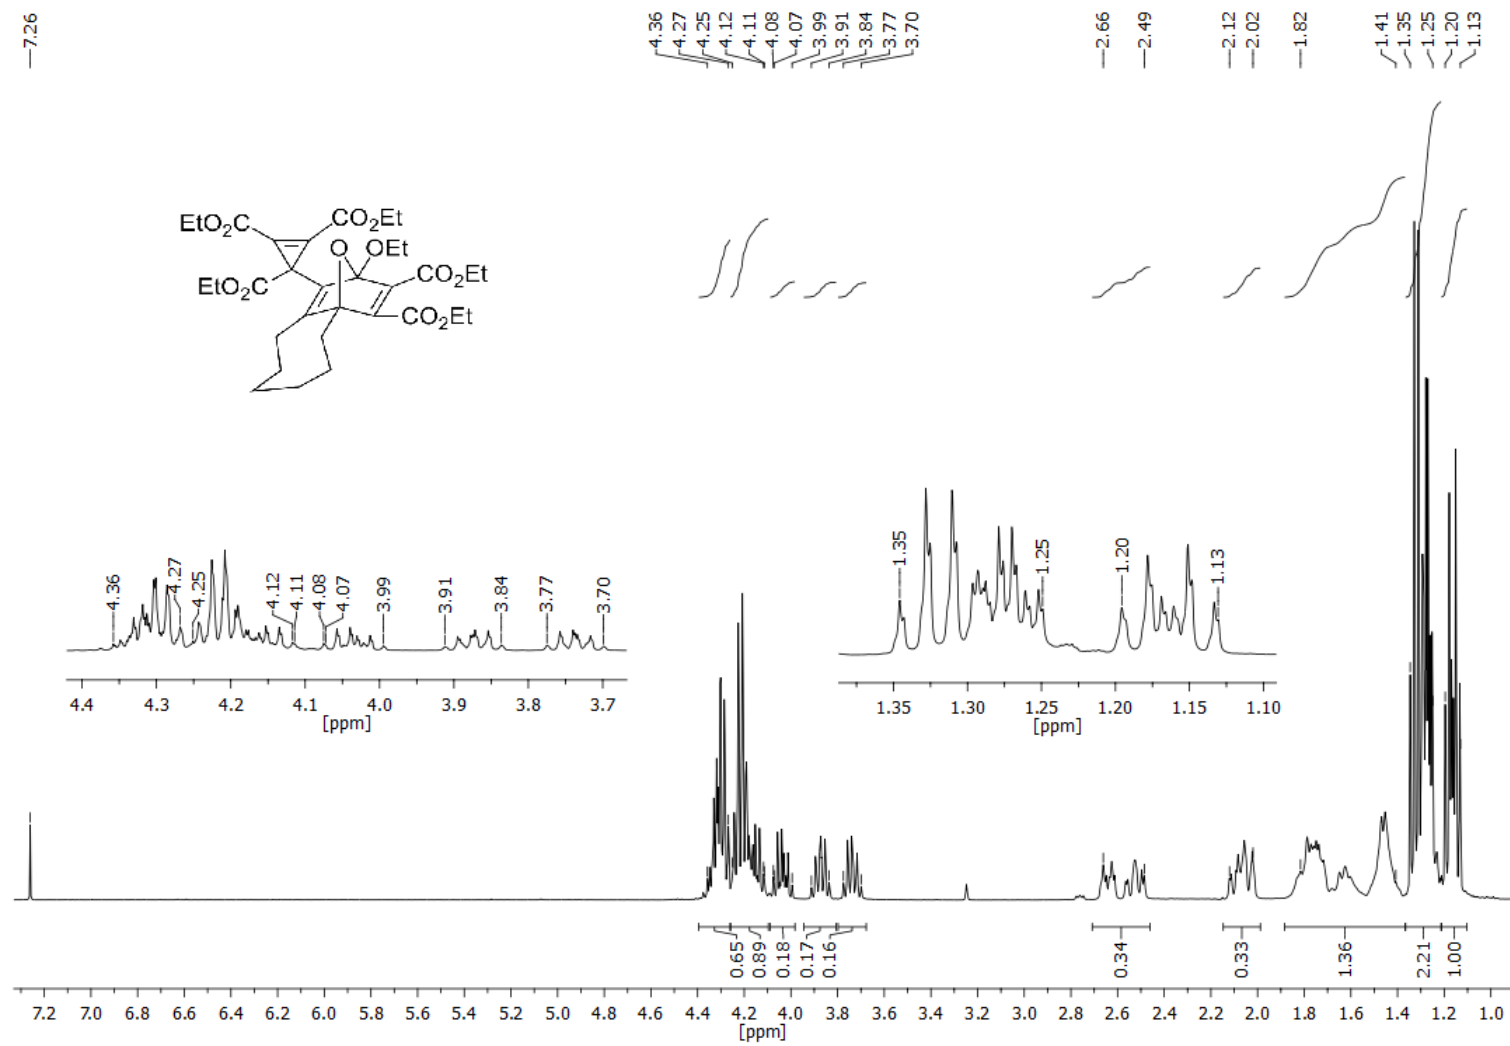

Figure S6.  $^{13}\text{C}$  NMR spectrum of **3d**.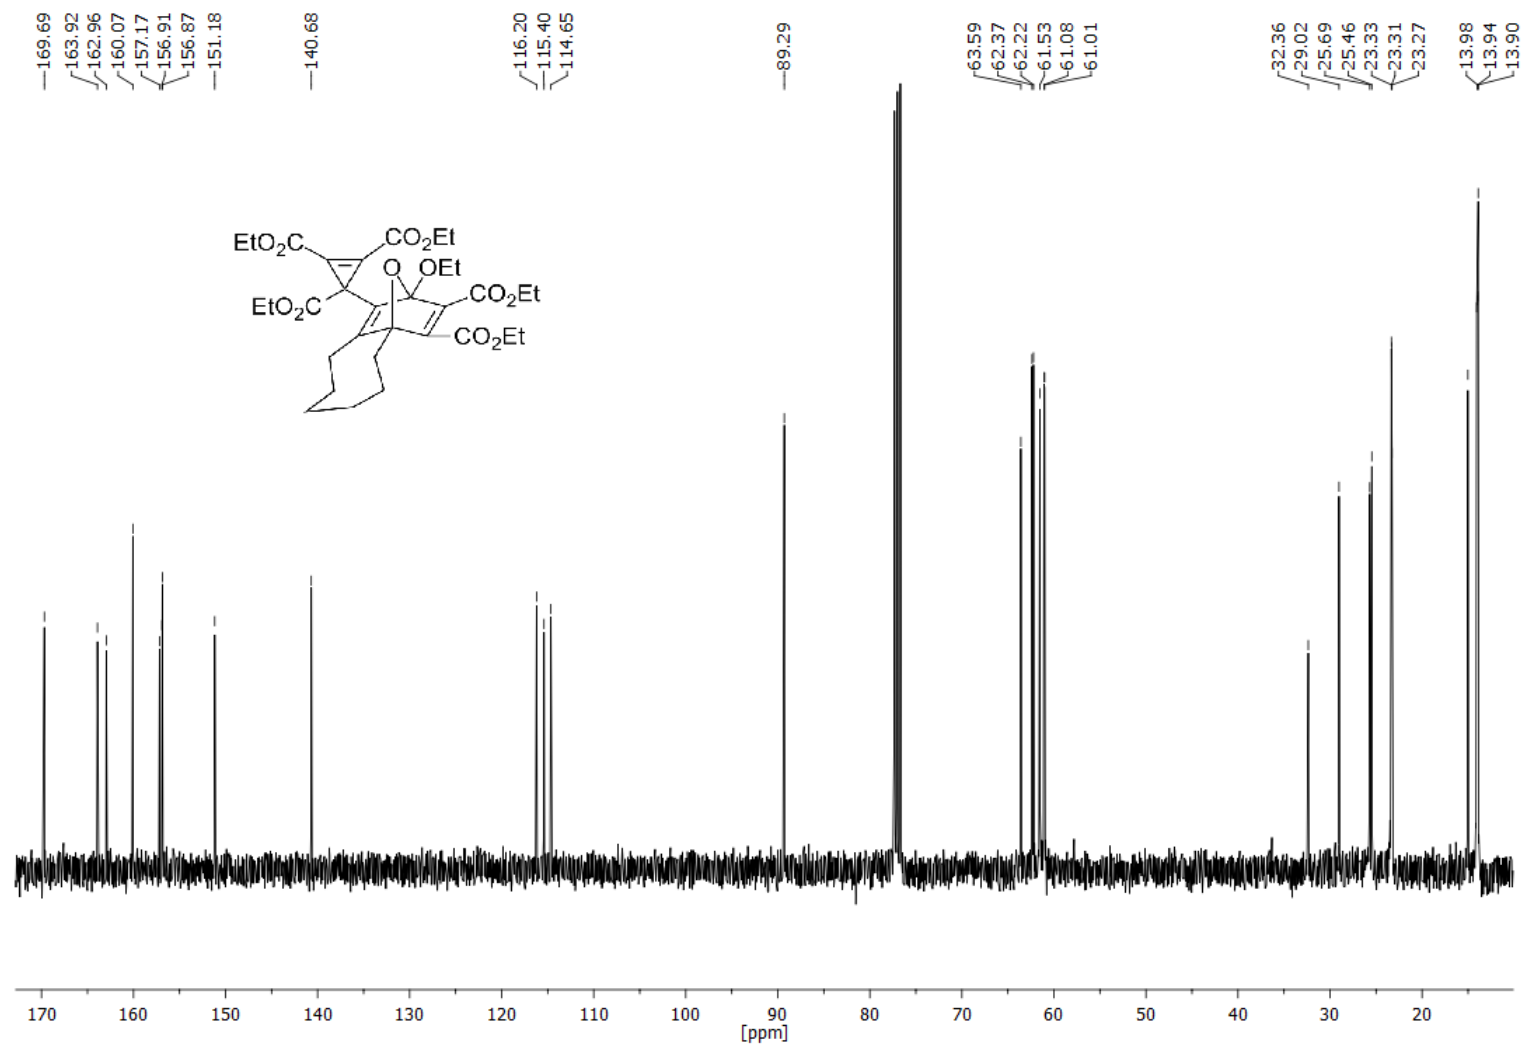

Figure S7.  $^1\text{H}$  NMR spectrum of **4a**.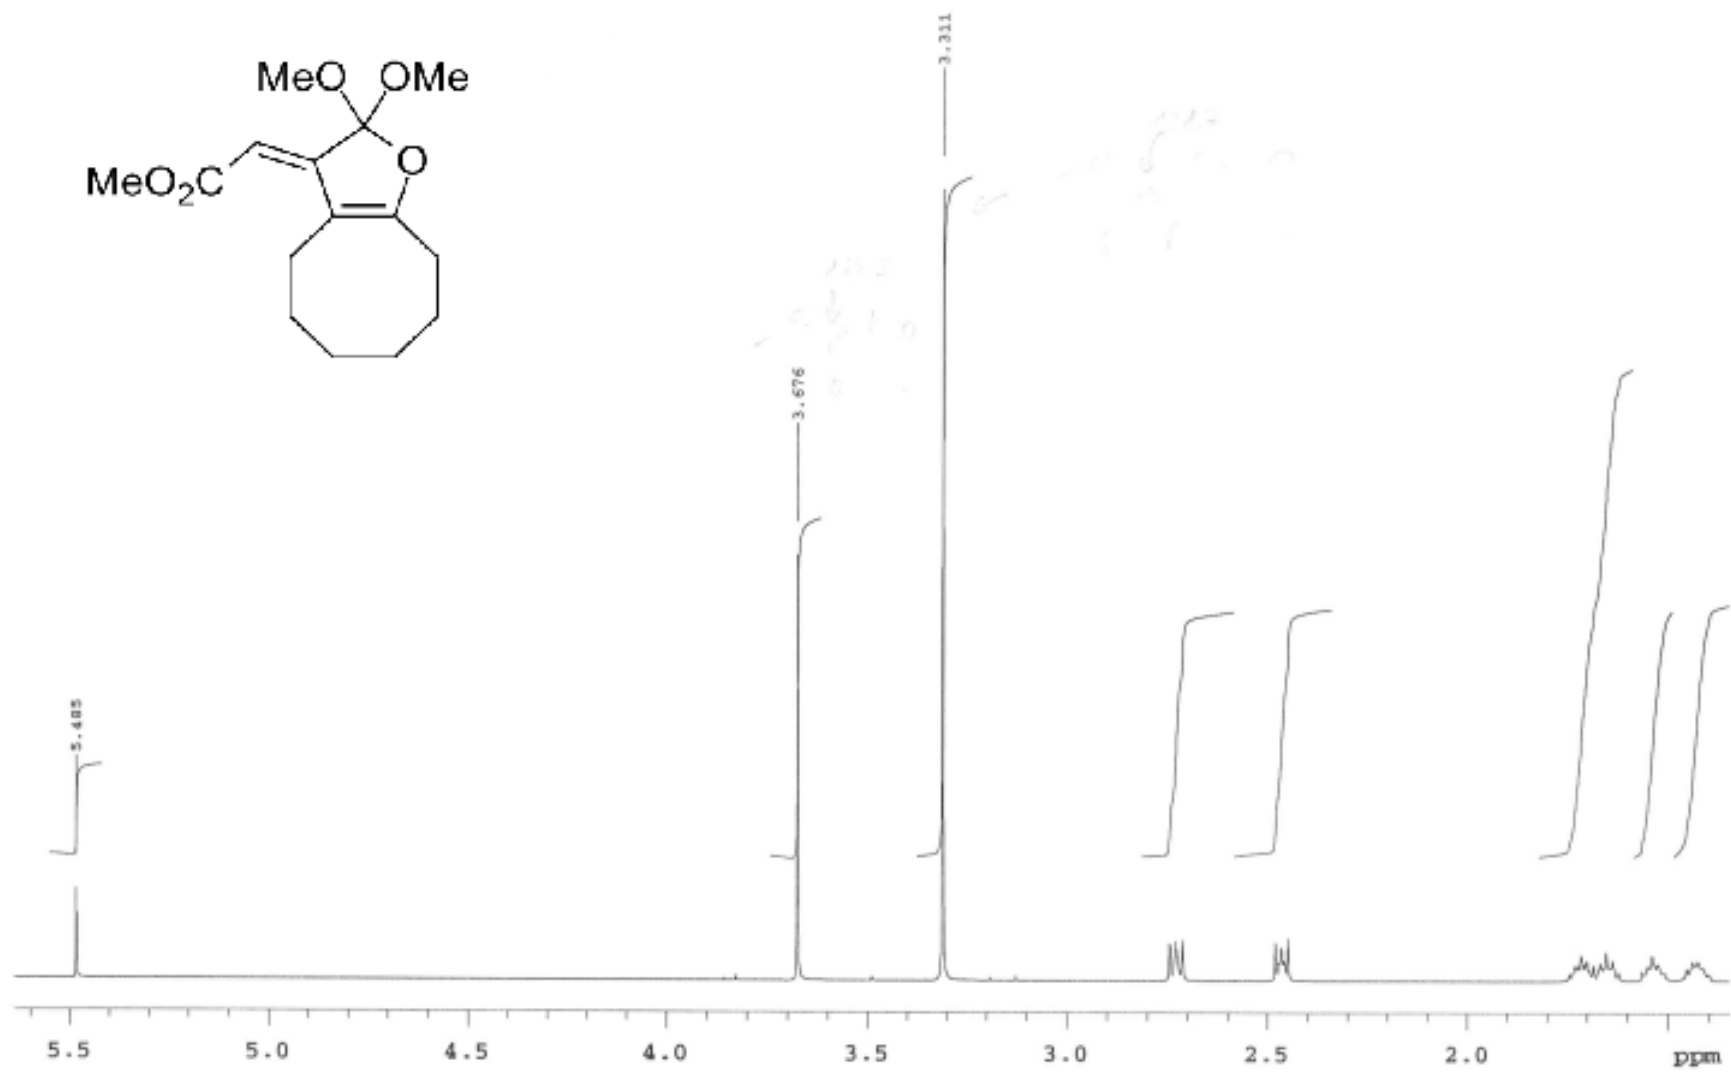

Figure S8.  $^{13}\text{C}$ NMR spectrum of **4a**.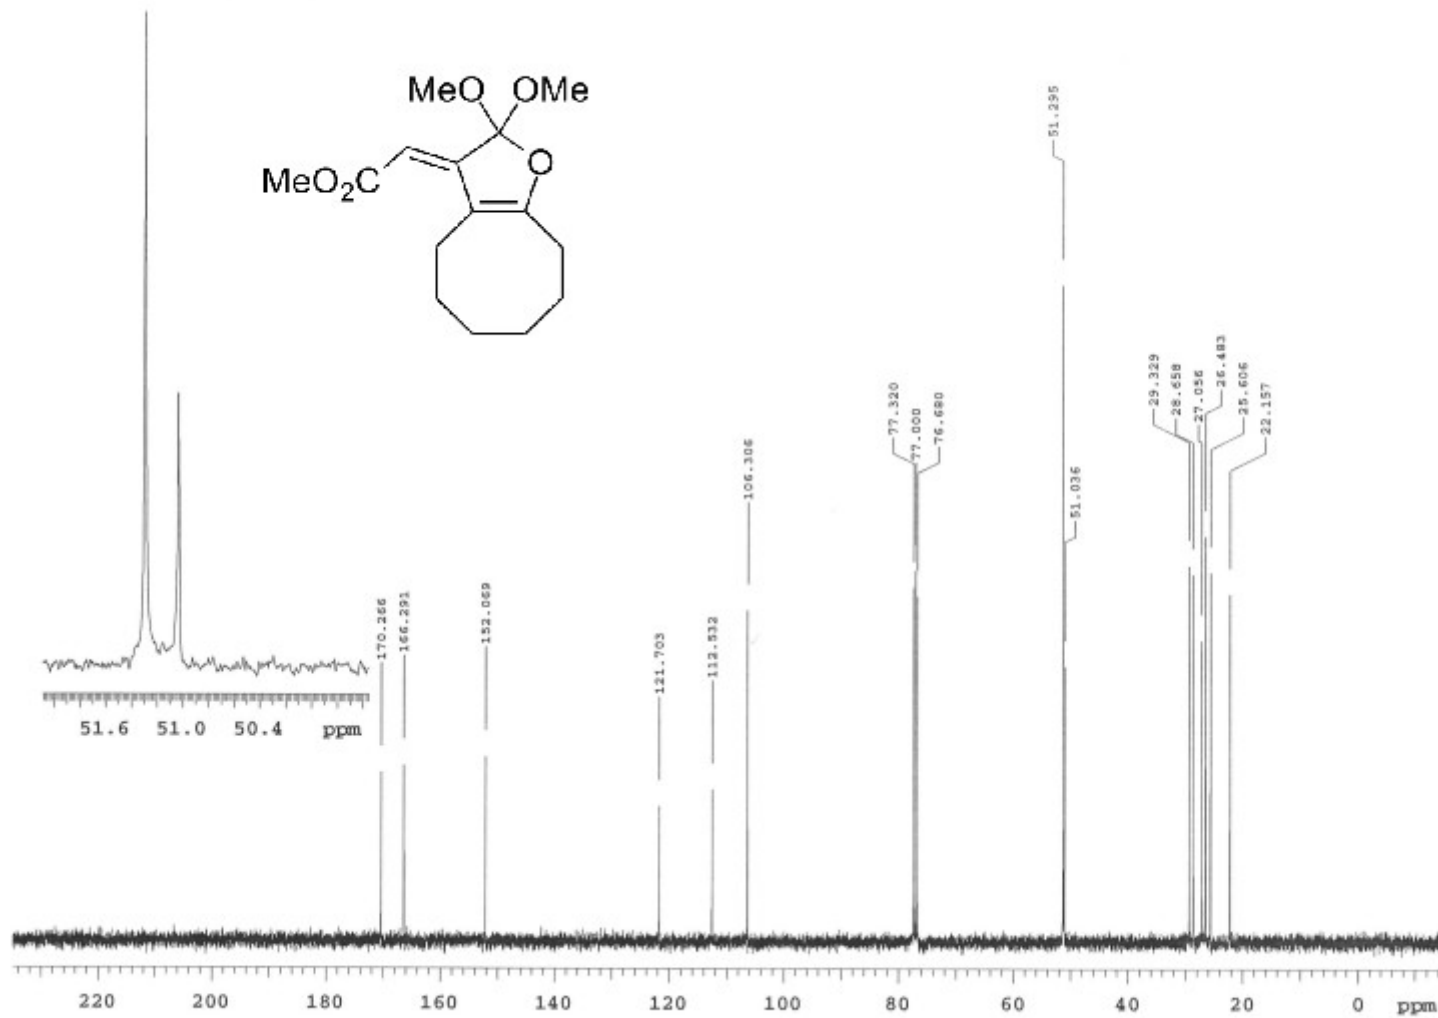



Figure S9. IR spectrum of 4a.

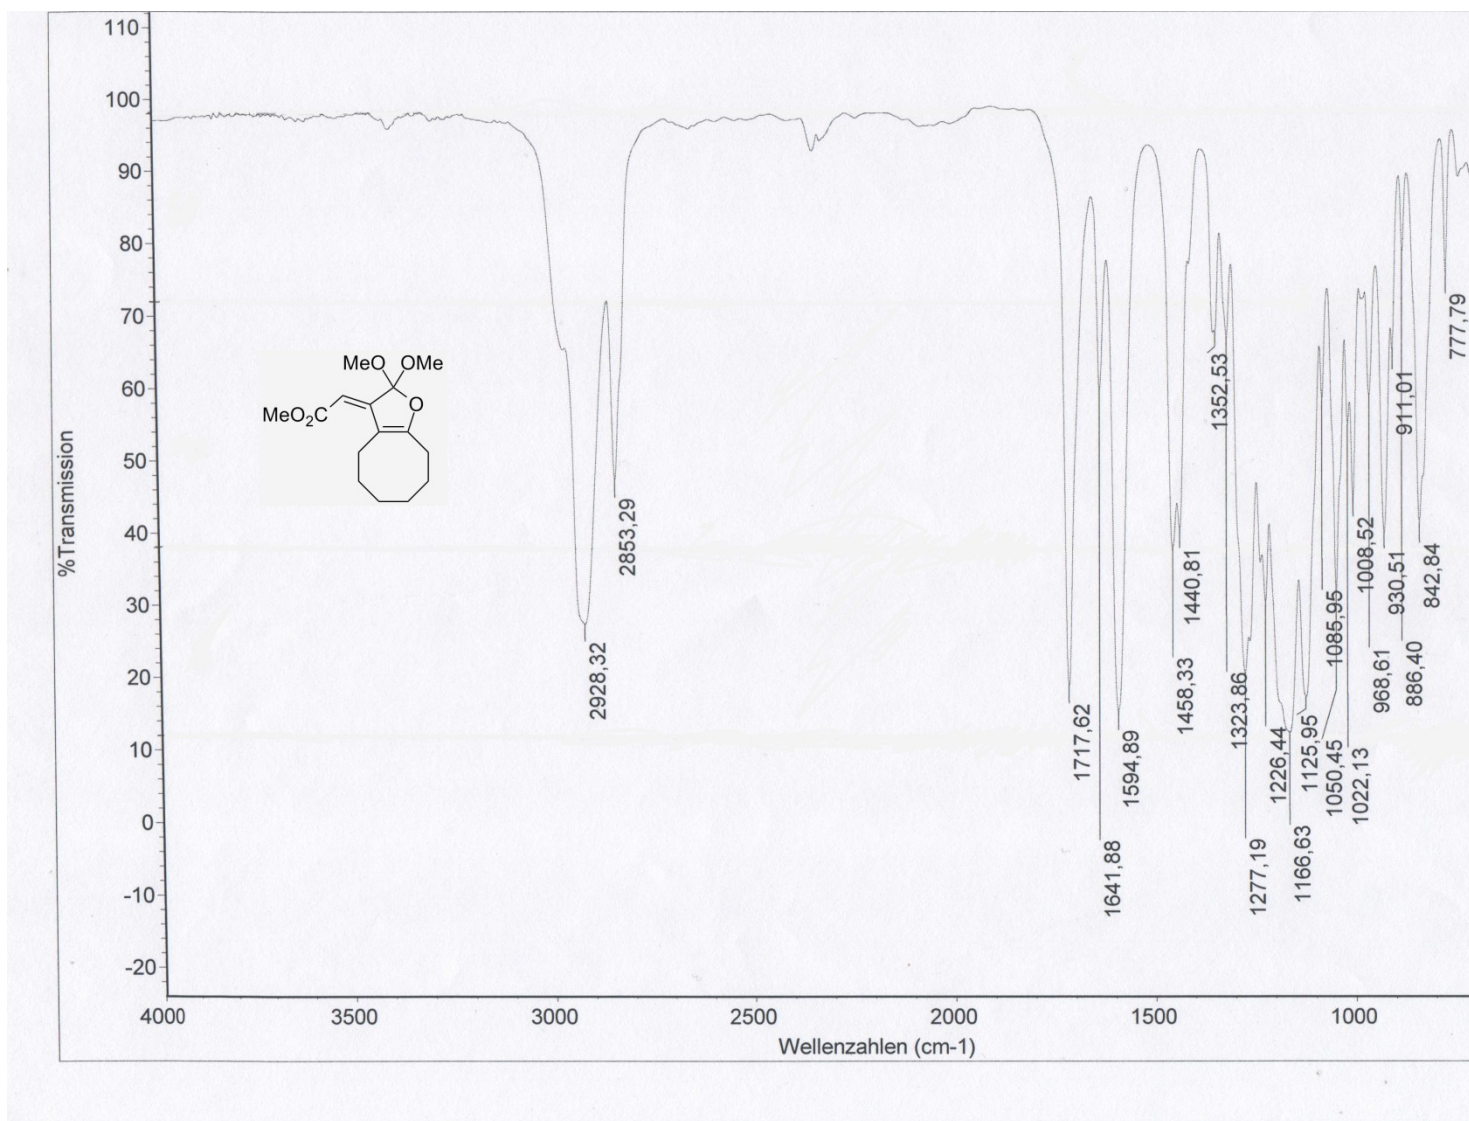

Figure S10.  $^1\text{H}$  NMR spectrum of **4b**.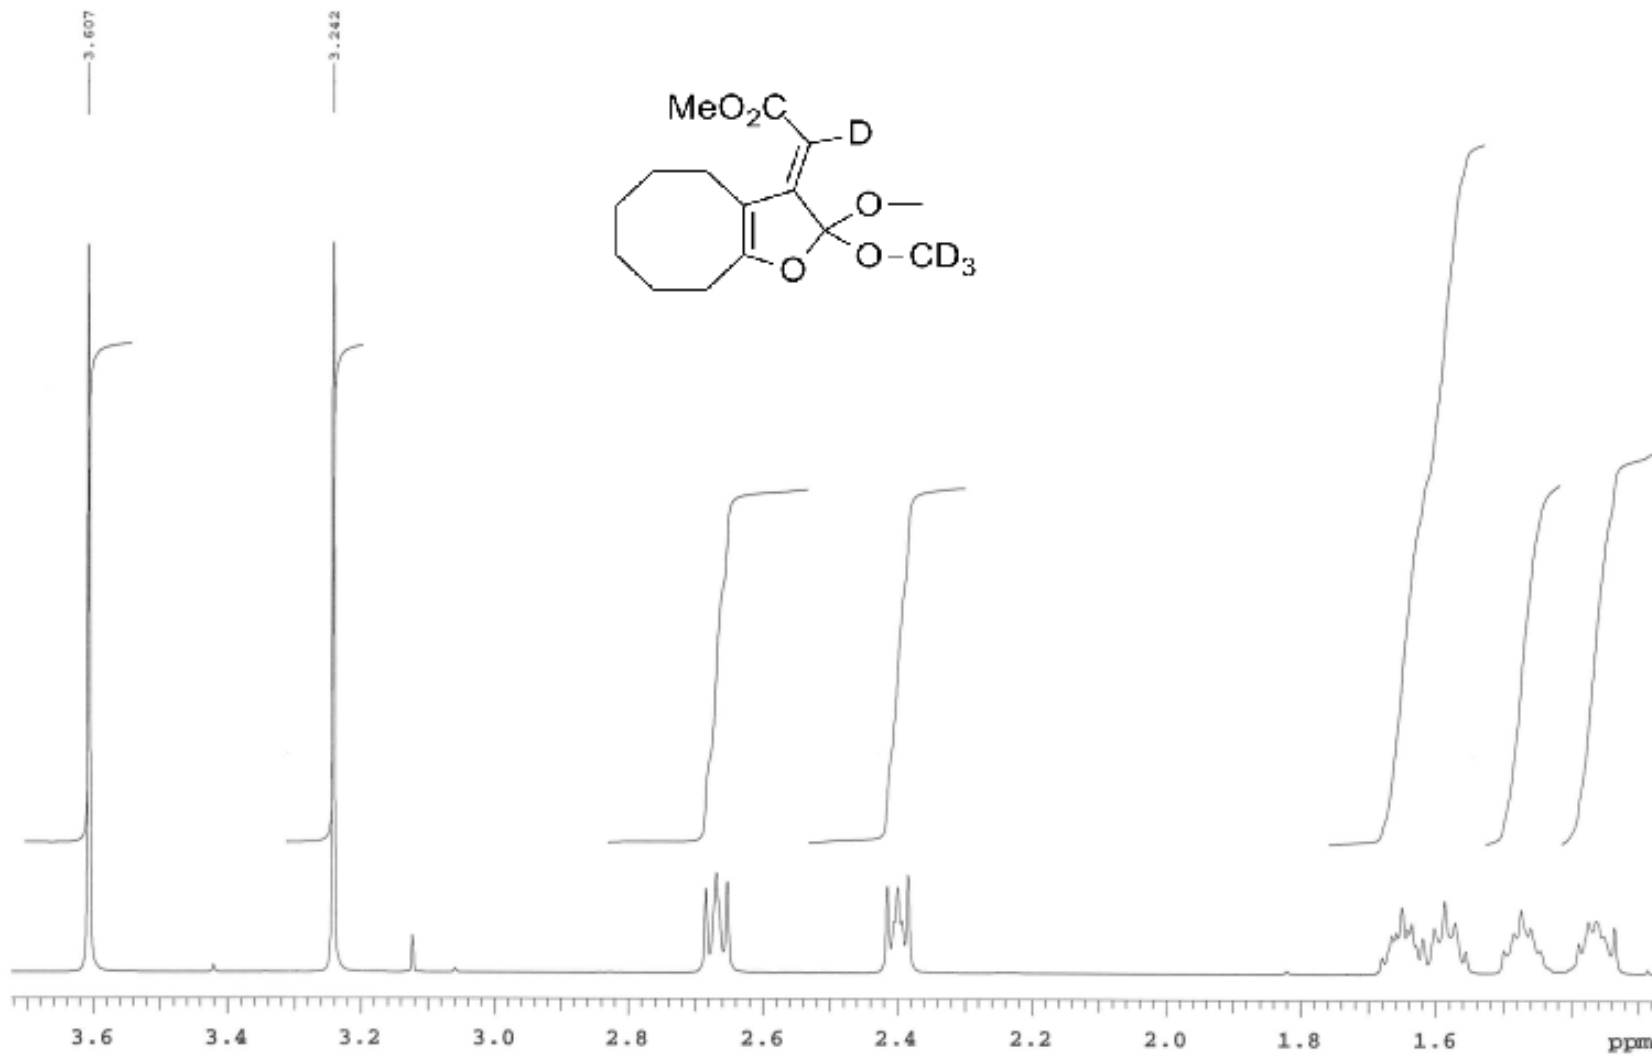

Figure S11.  $^{13}\text{C}$  NMR spectrum of **4b**.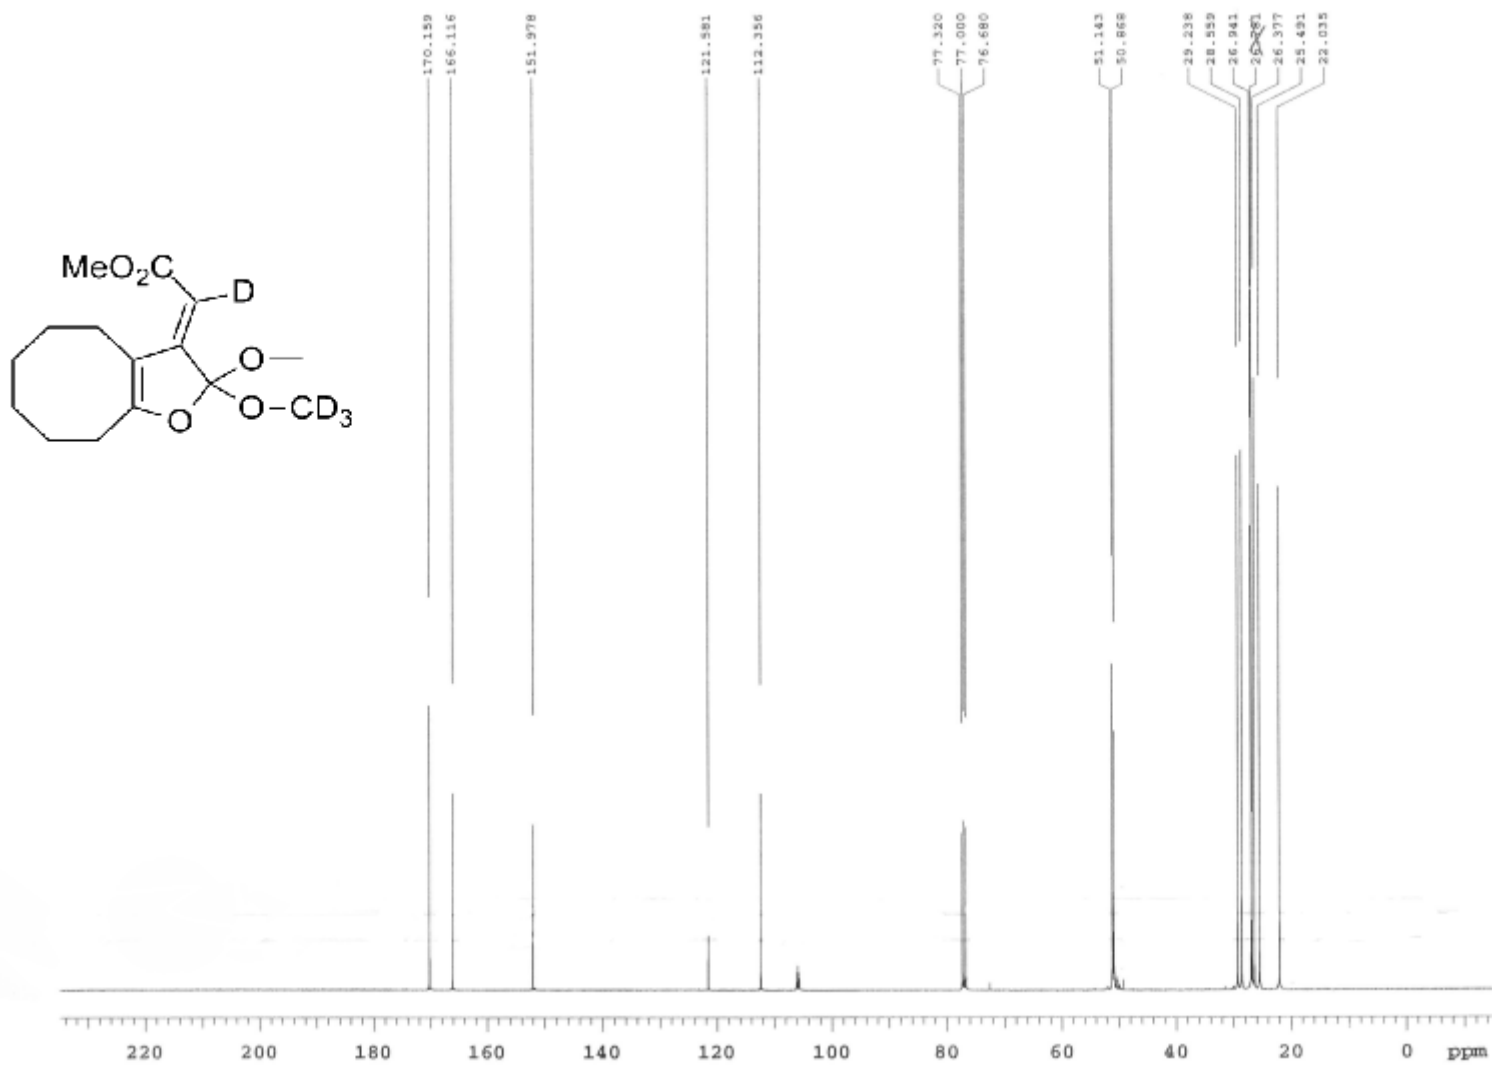

Figure S12. <sup>1</sup>H NMR spectrum of 4c.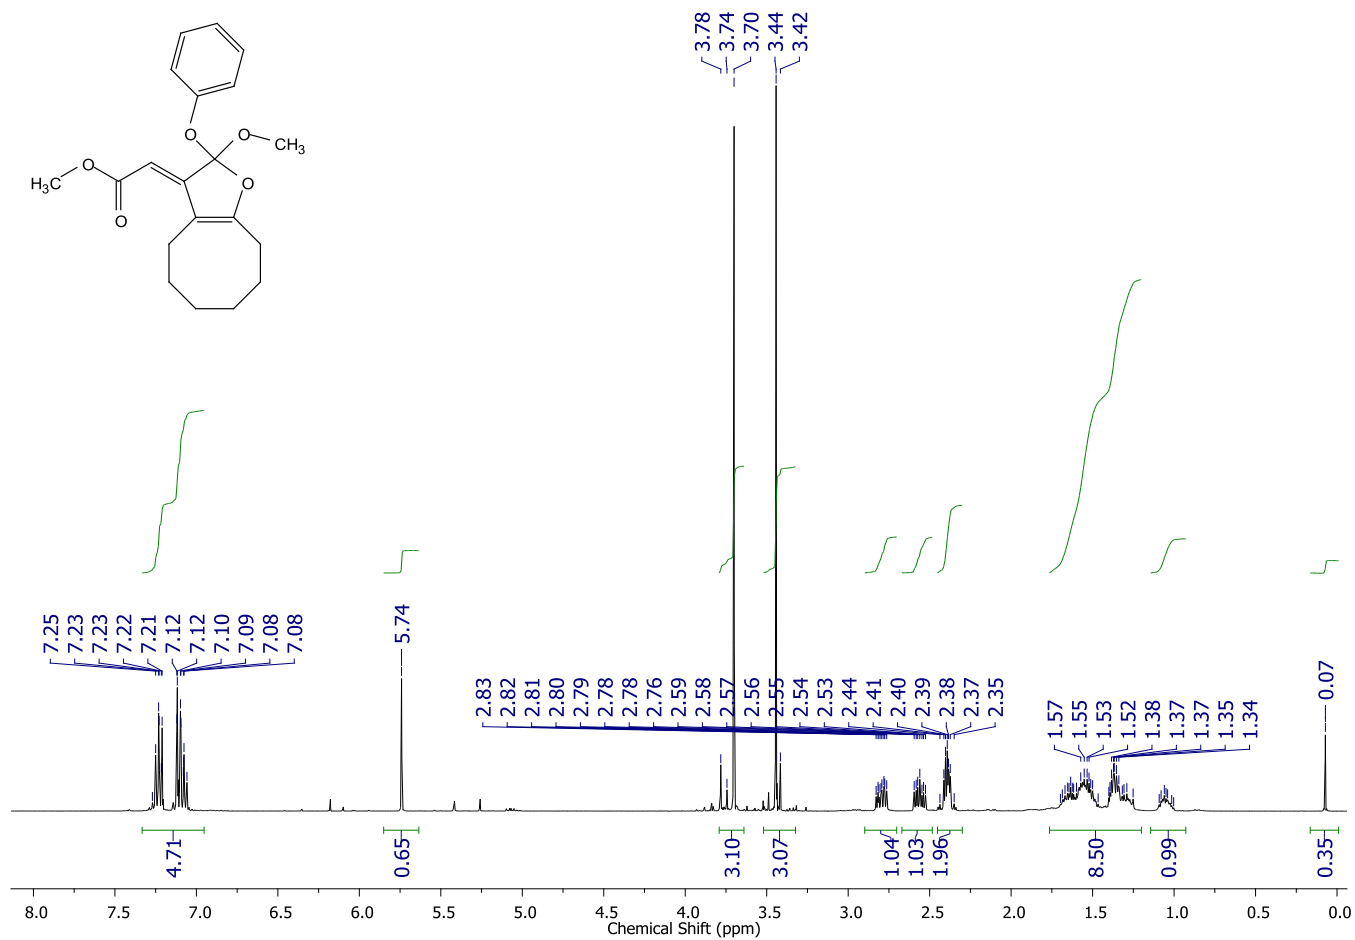

Figure S13.  $^{13}\text{C}$  NMR spectrum of **4c**.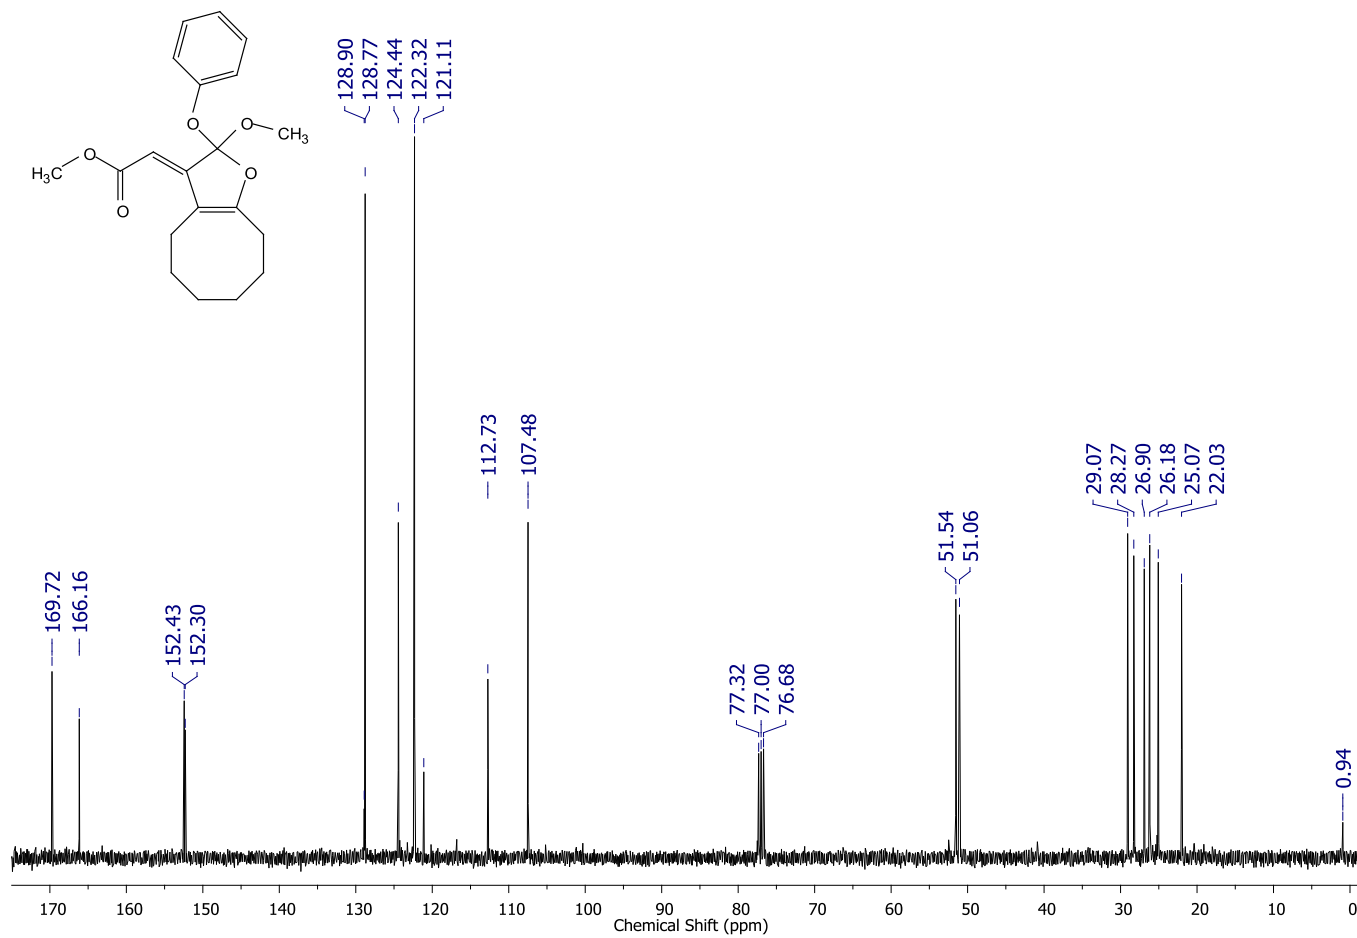

Figure S14. IR spectrum of 4c.

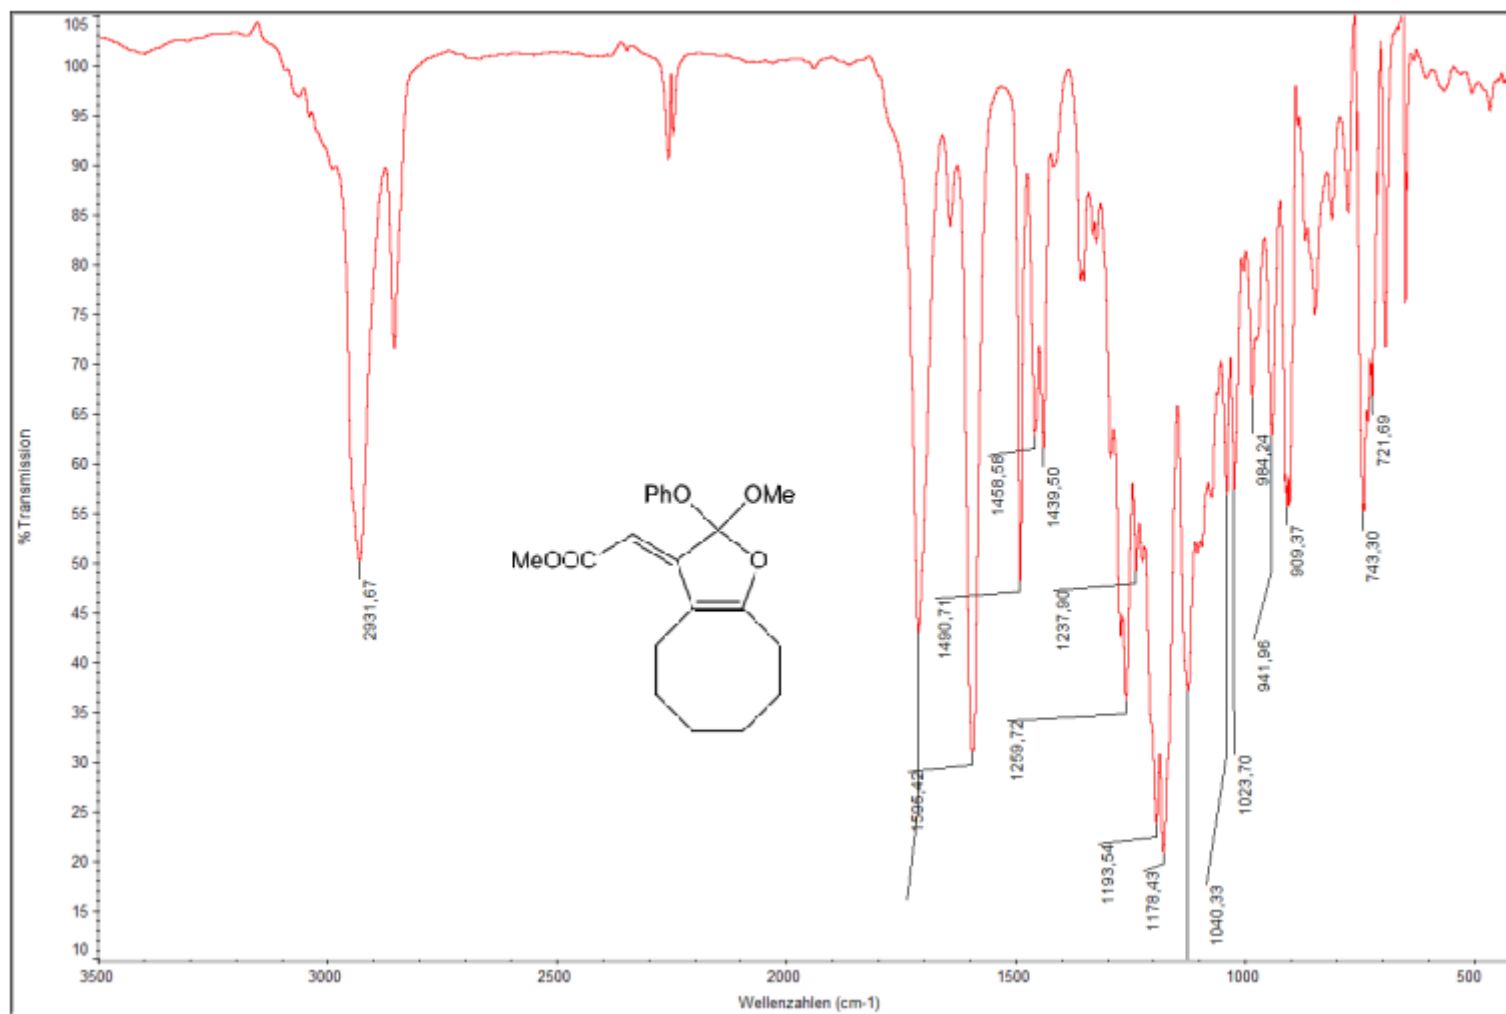

Figure S15.  $^1\text{H}$  NMR spectrum of (E)-5.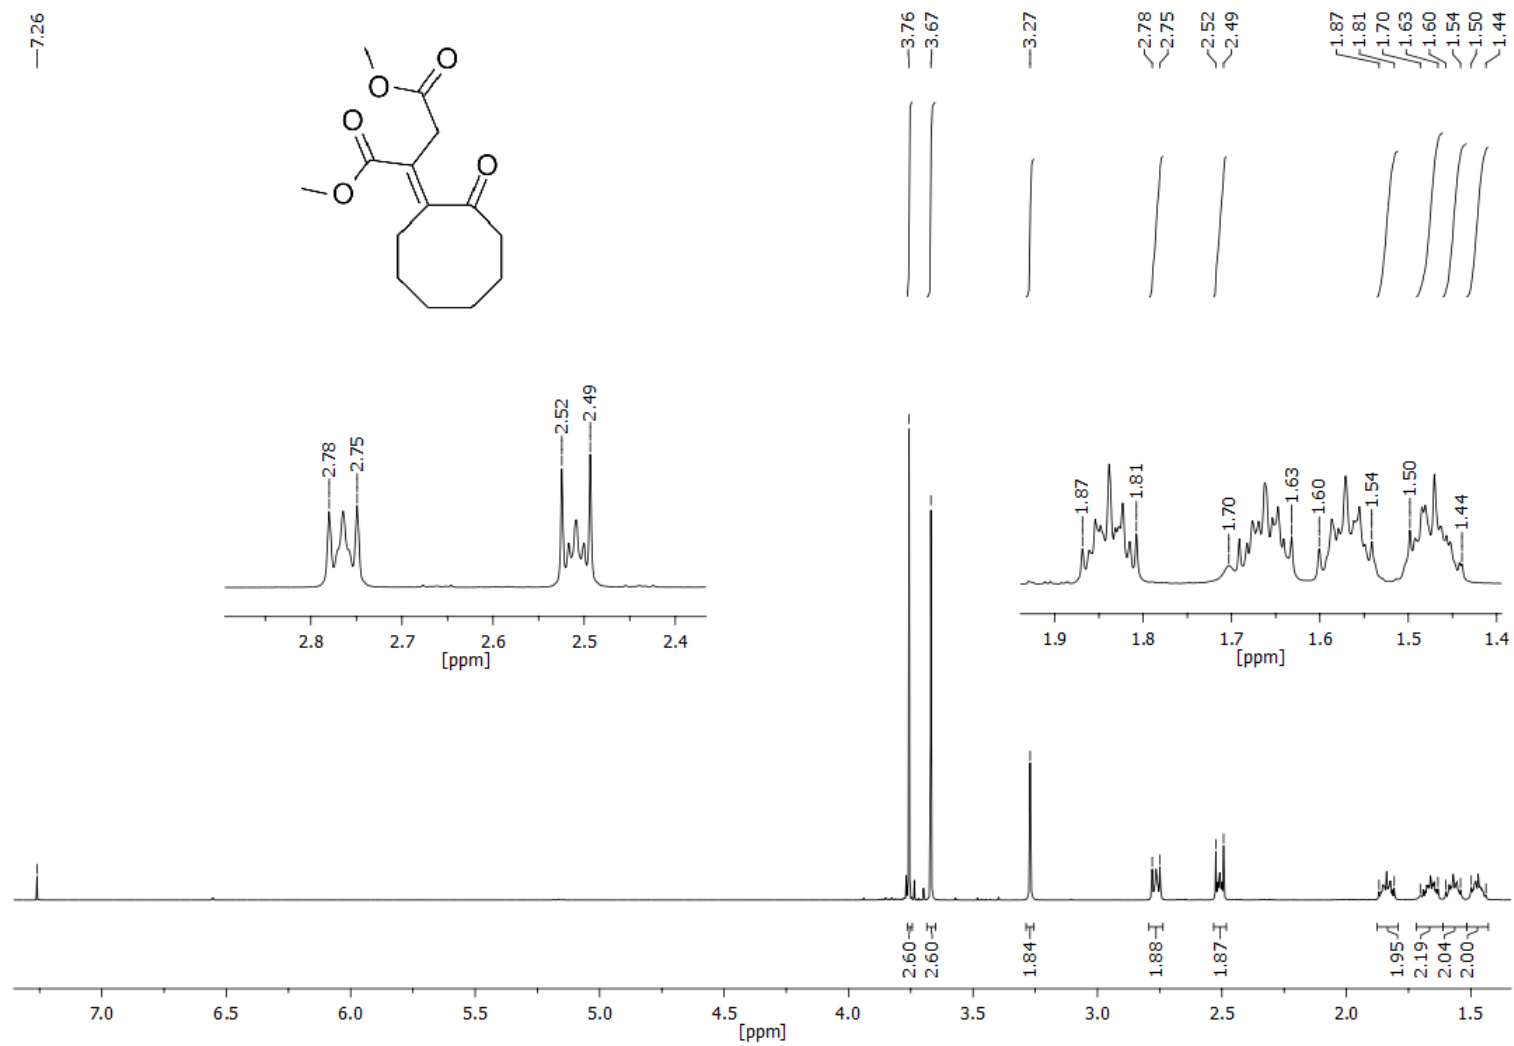

Figure S16.  $^{13}\text{C}$  NMR spectrum of (E)-5.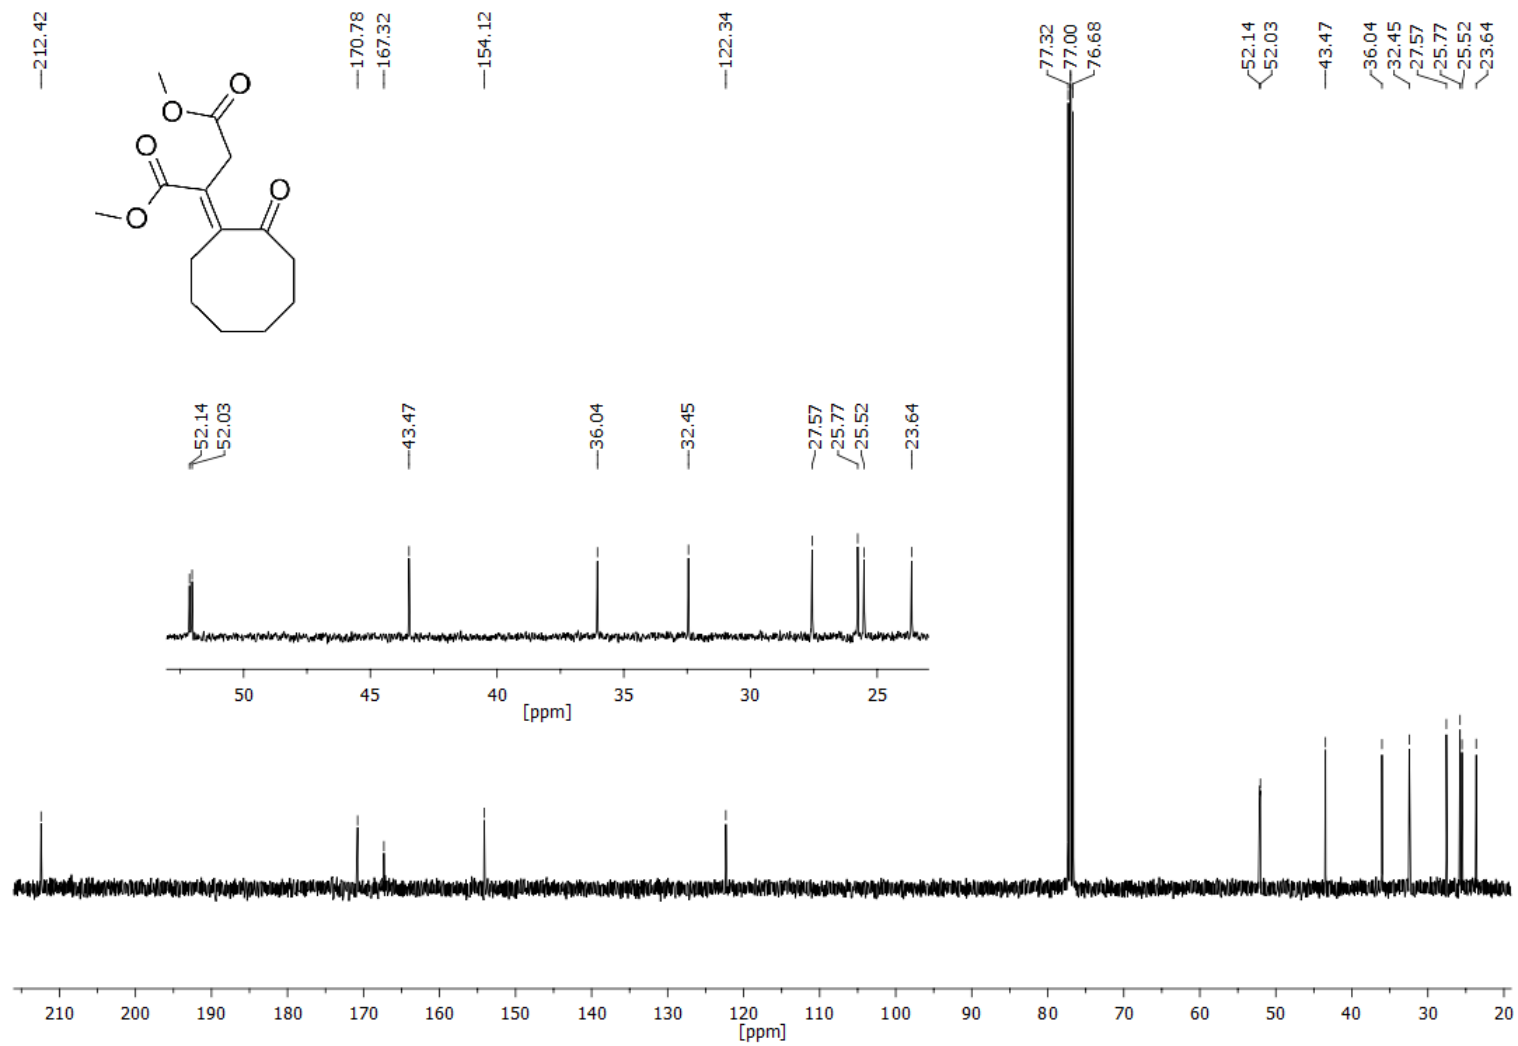



Figure S17. gHSQC-AD spectrum of (E)-5.

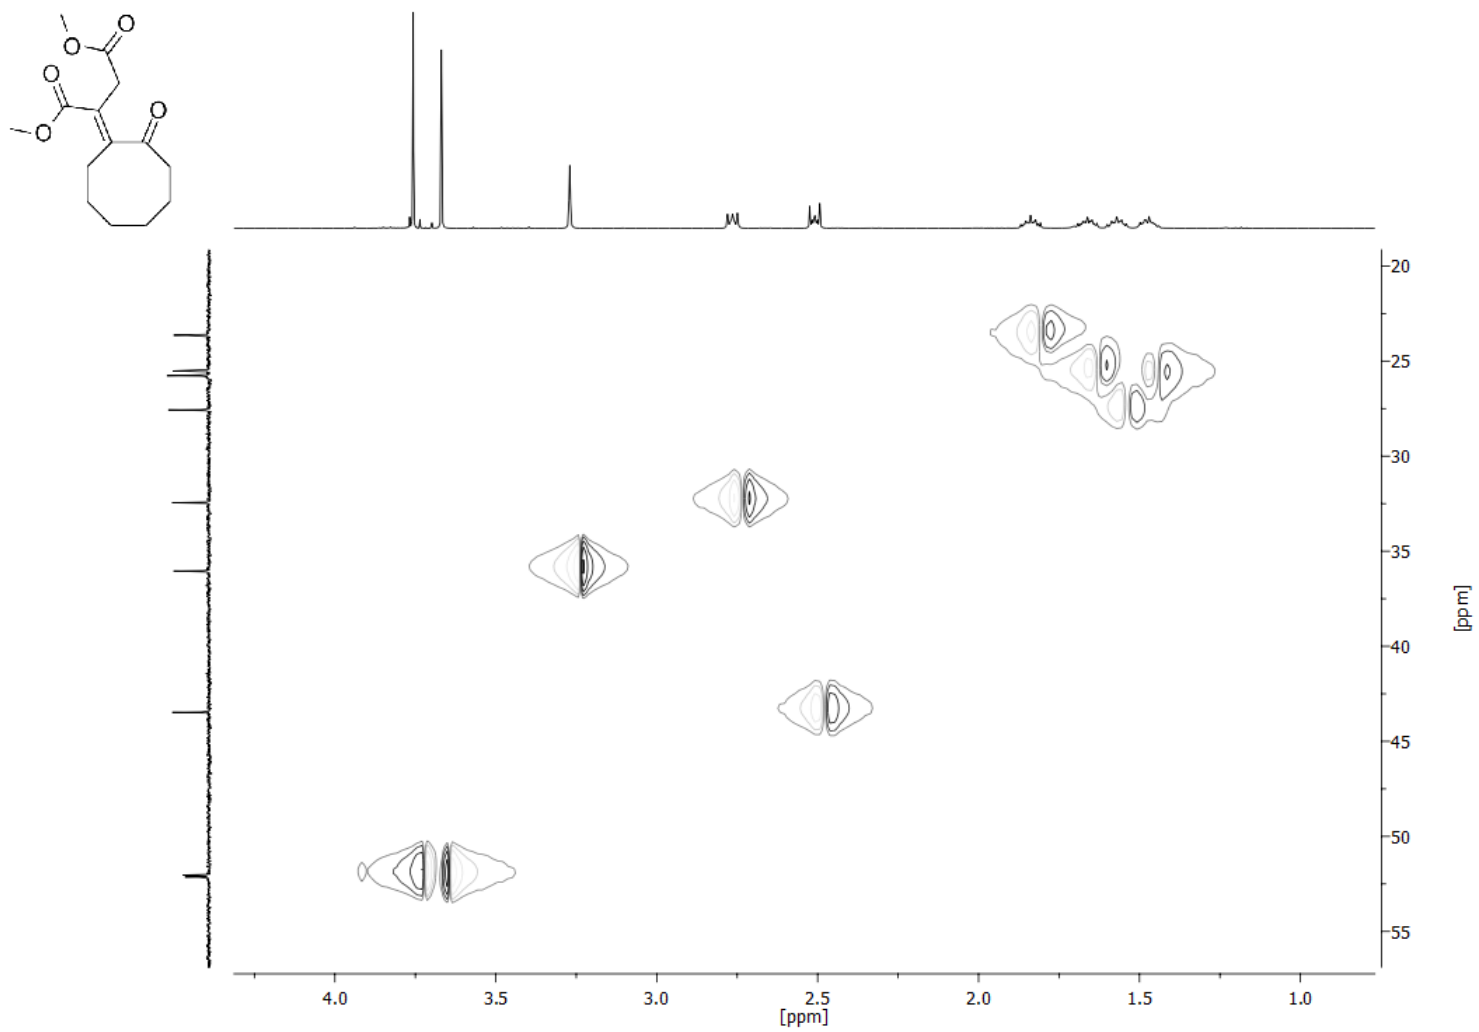

Figure S18. gHMBC-AD spectrum of (E)-5.

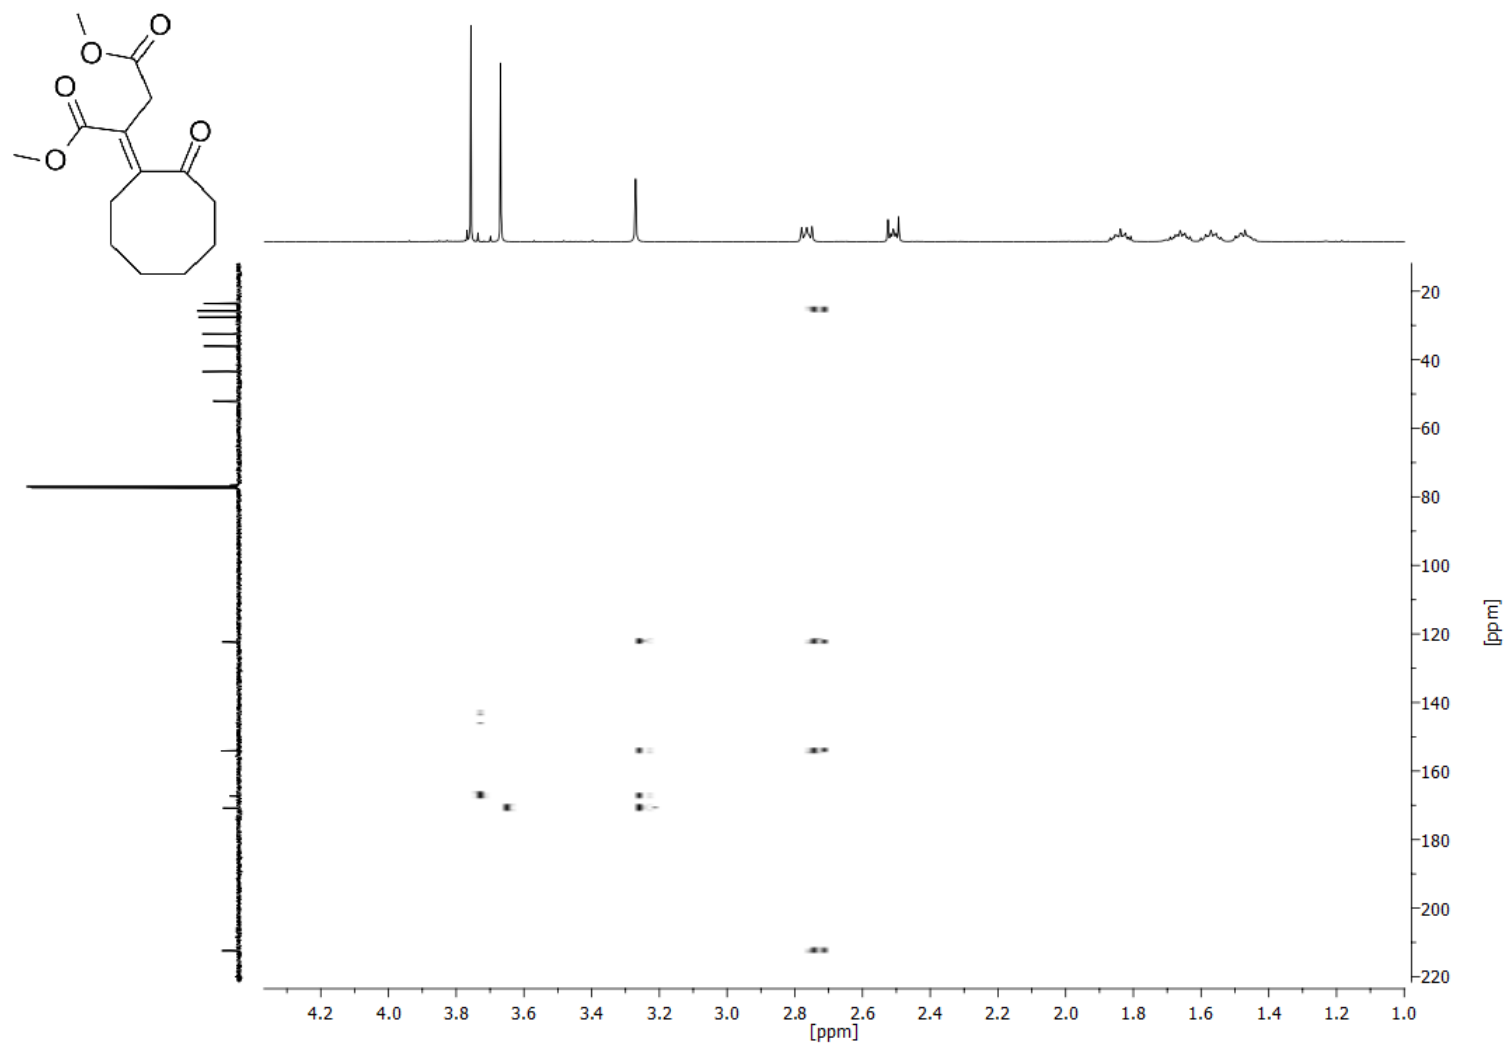

Figure S19.  $^1\text{H}$  NMR spectrum of (Z)-5.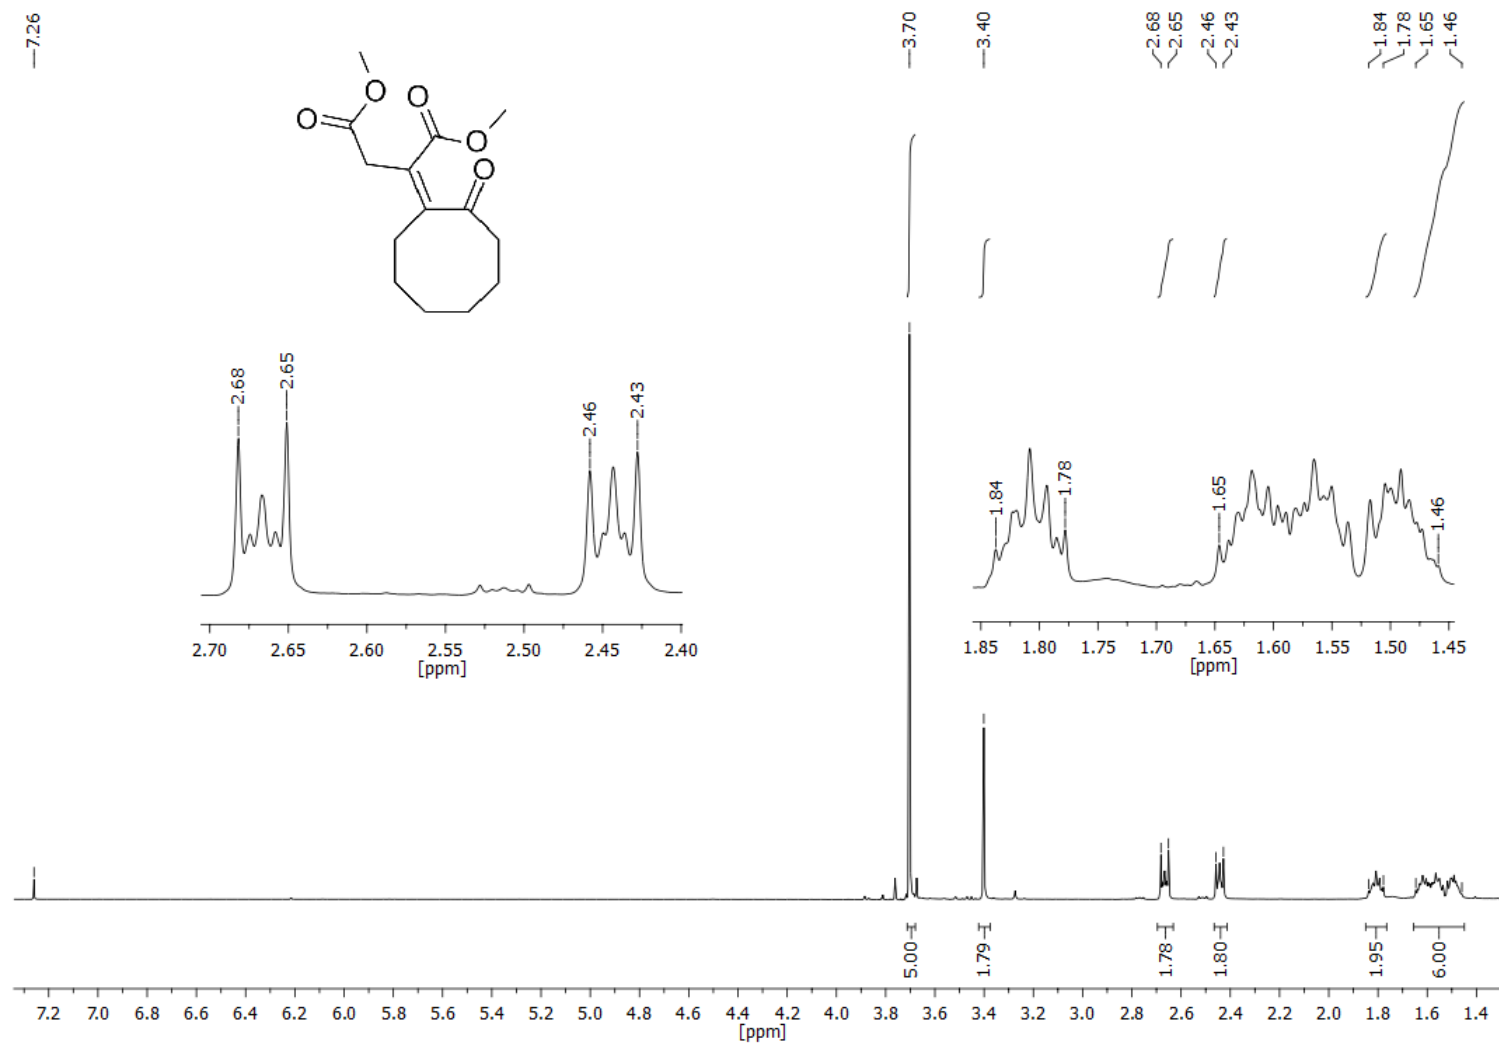

Figure S20.  $^{13}\text{C}$  NMR spectrum of (Z)-5.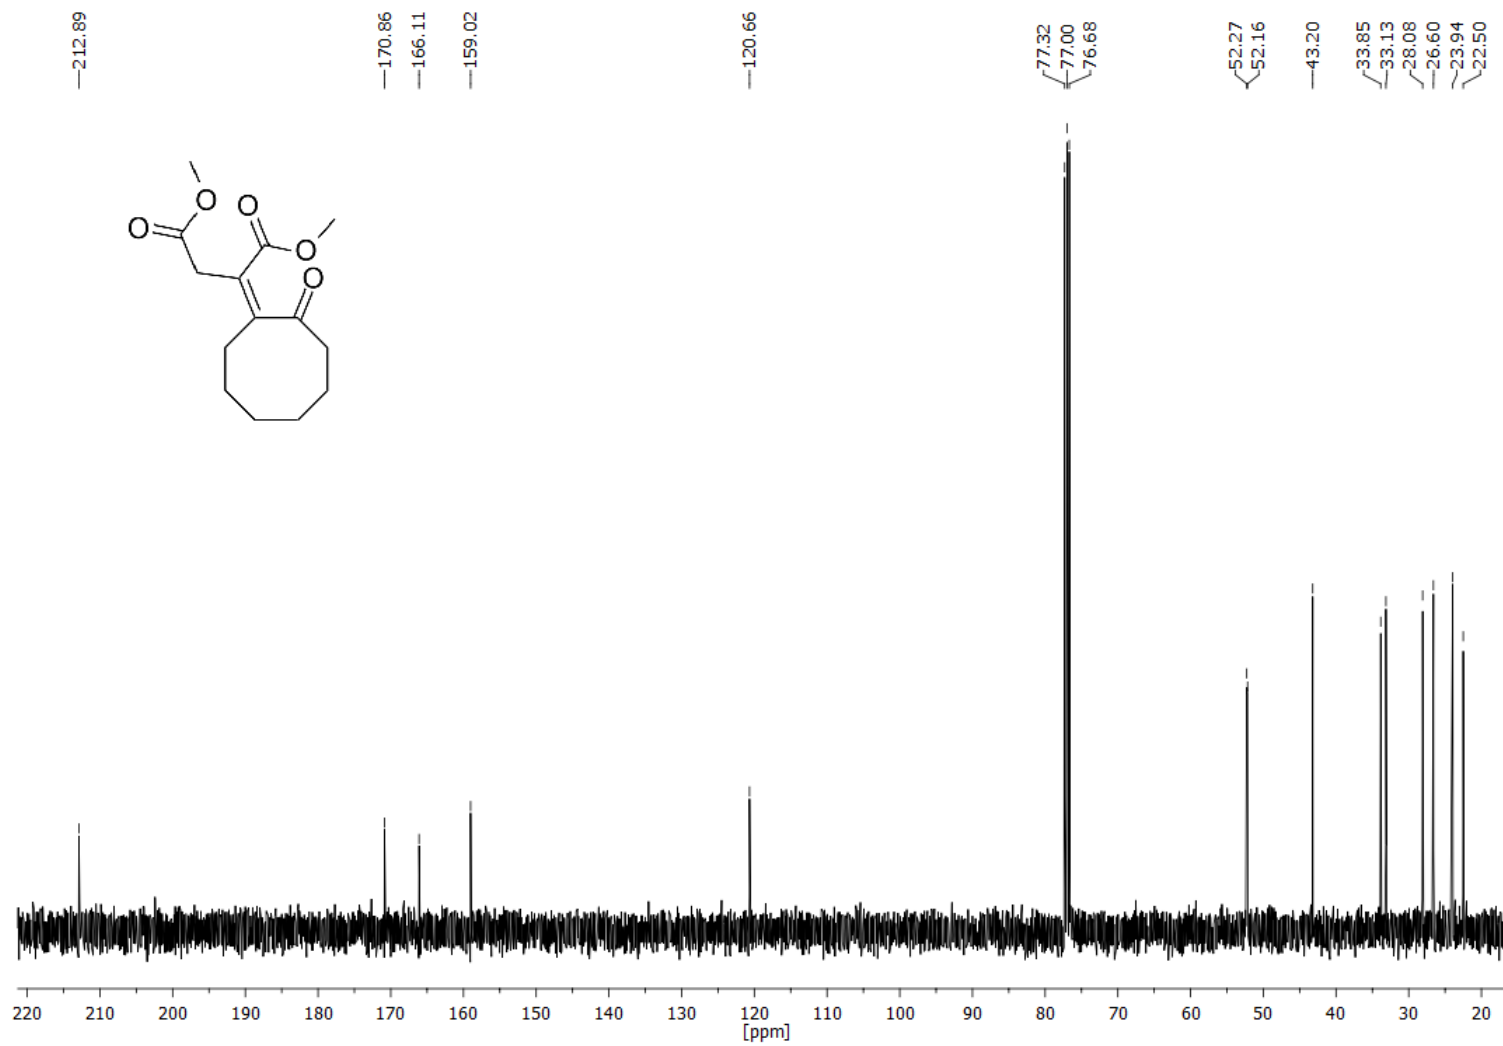

Figure S21.  $^1\text{H}$  NMR spectrum of **6a**.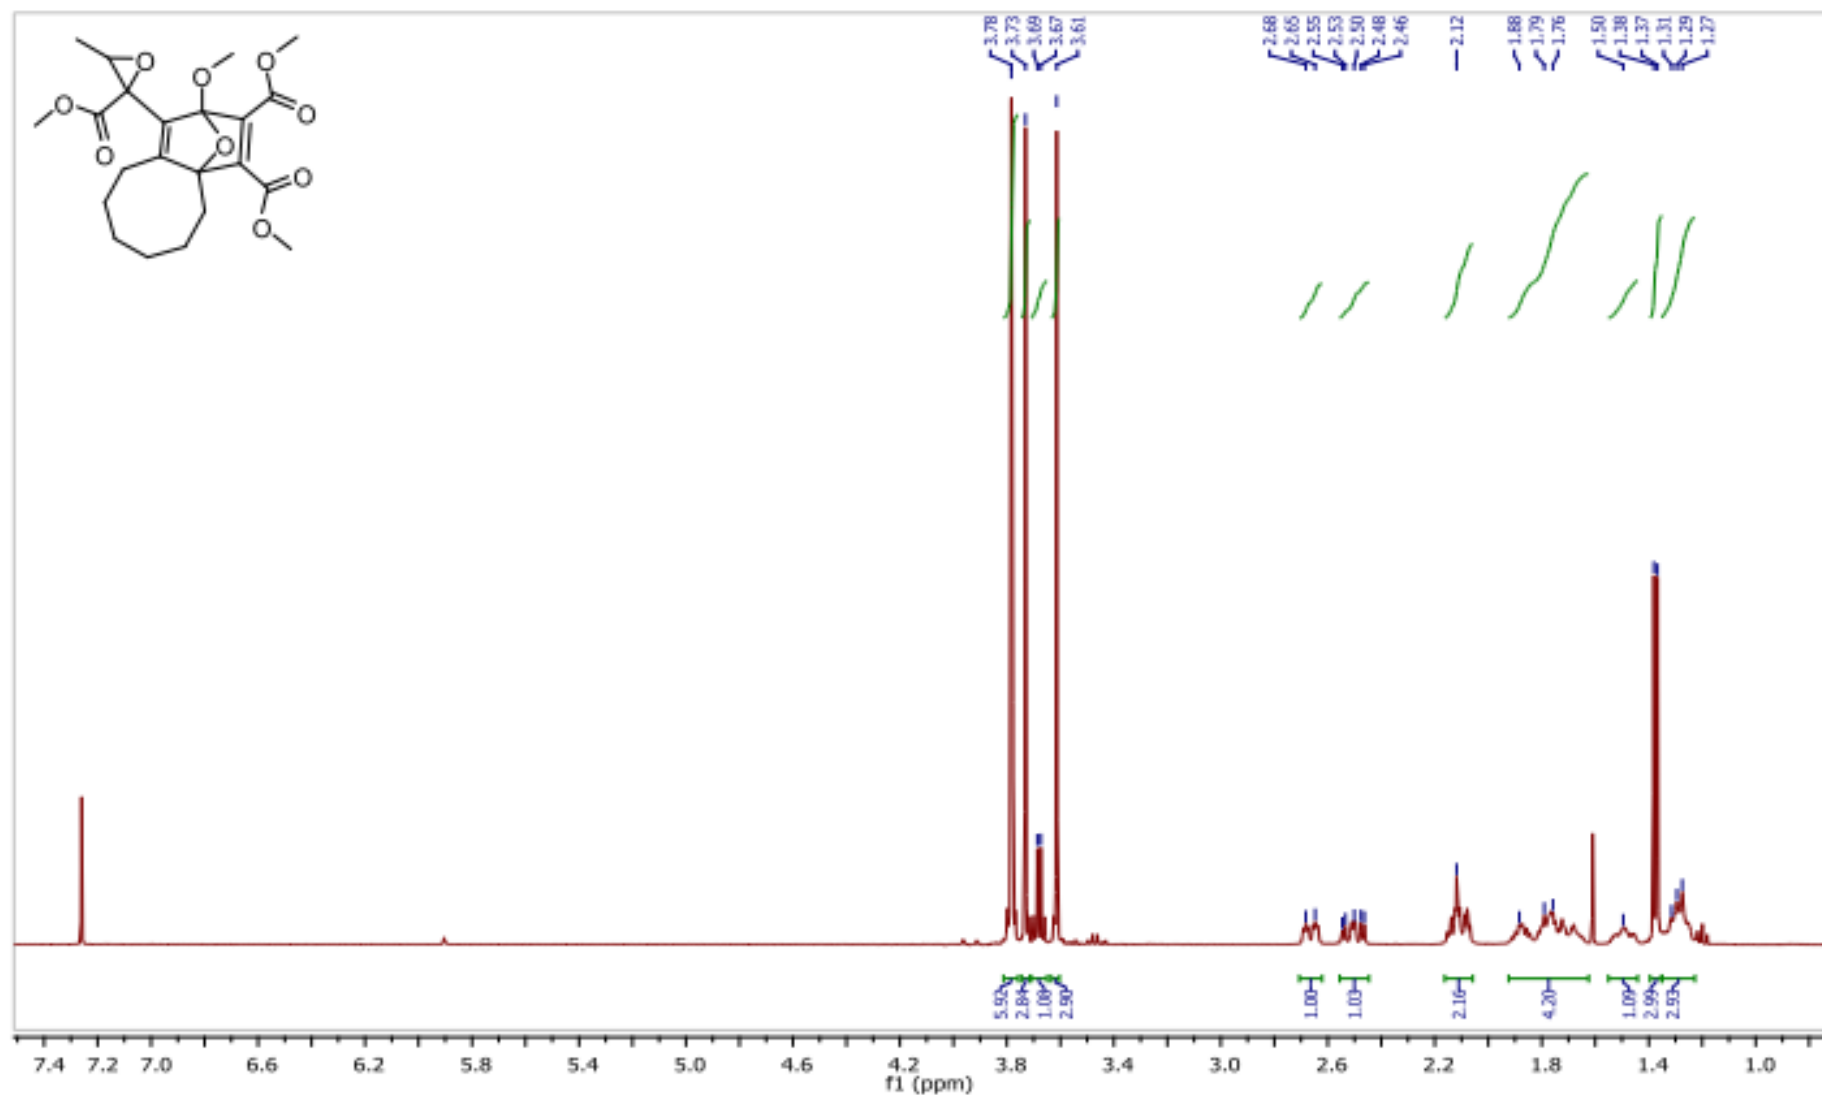

Figure S22.  $^{13}\text{C}$  NMR spectrum of **6a**.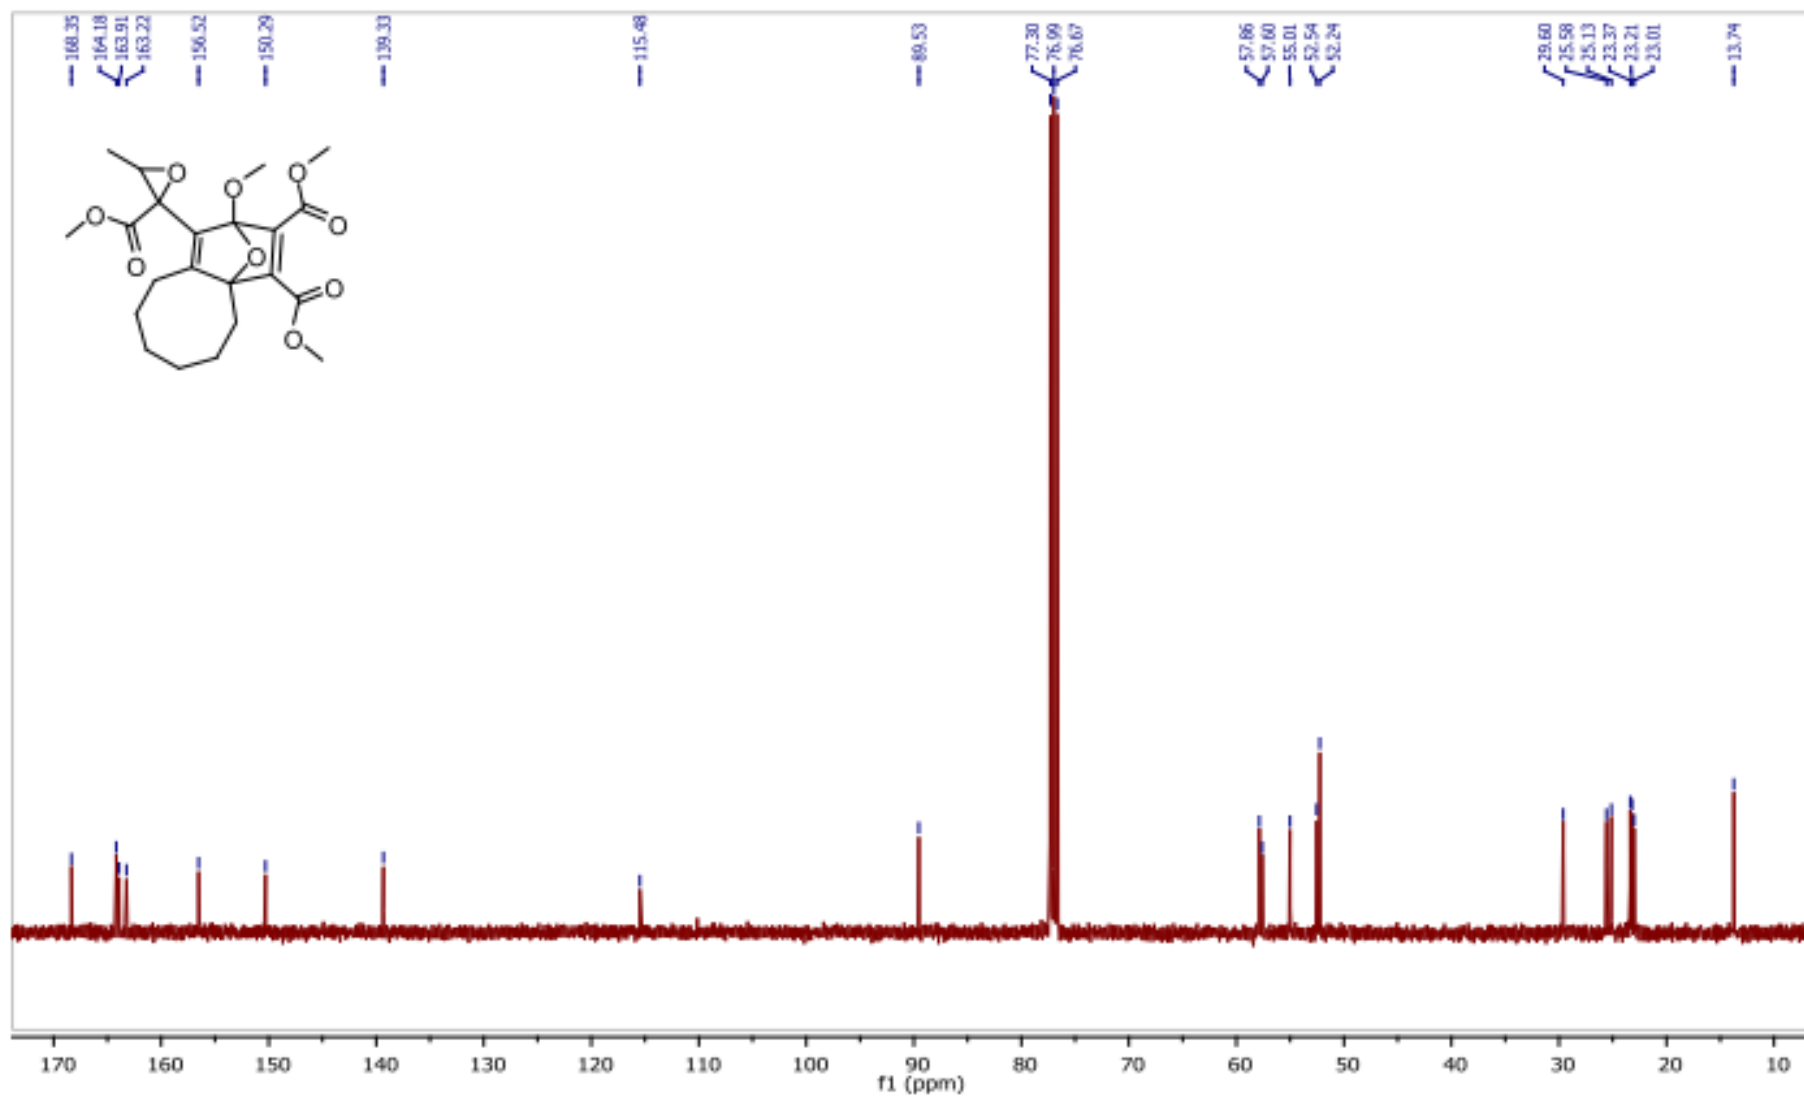

**Figure S23.** IR spectrum of **6a**.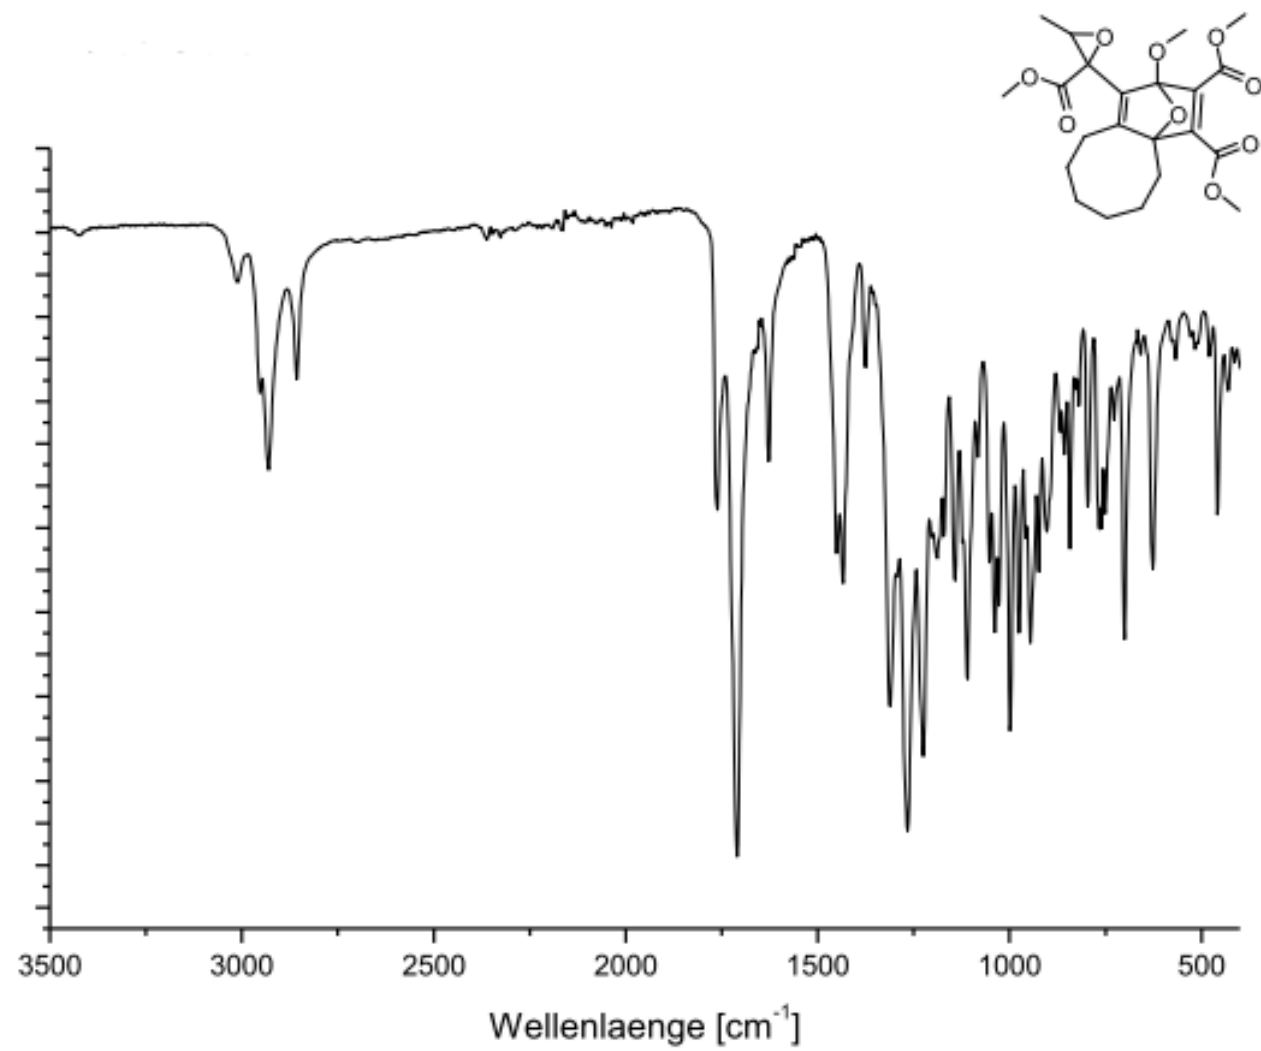

Figure S24.  $^1\text{H}$  NMR spectrum of **6b**.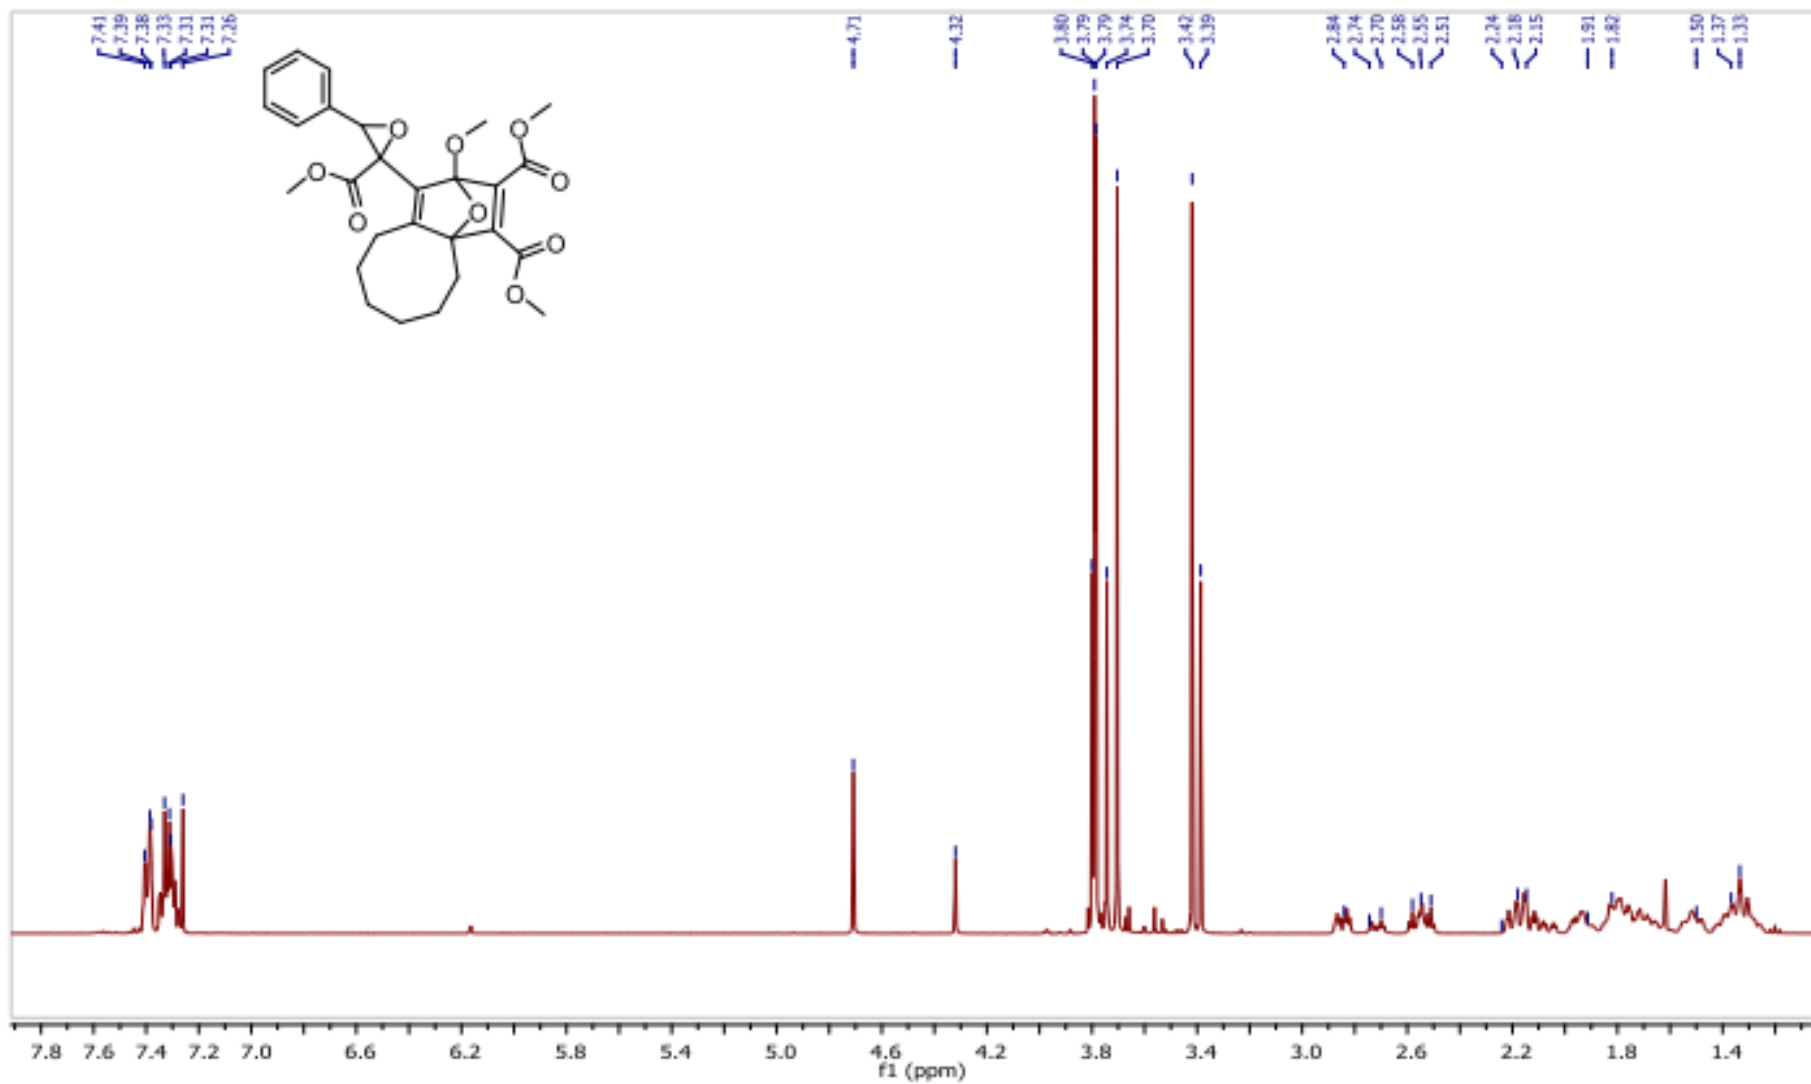



Figure S25.  $^{13}\text{C}$  NMR spectrum of **6b**.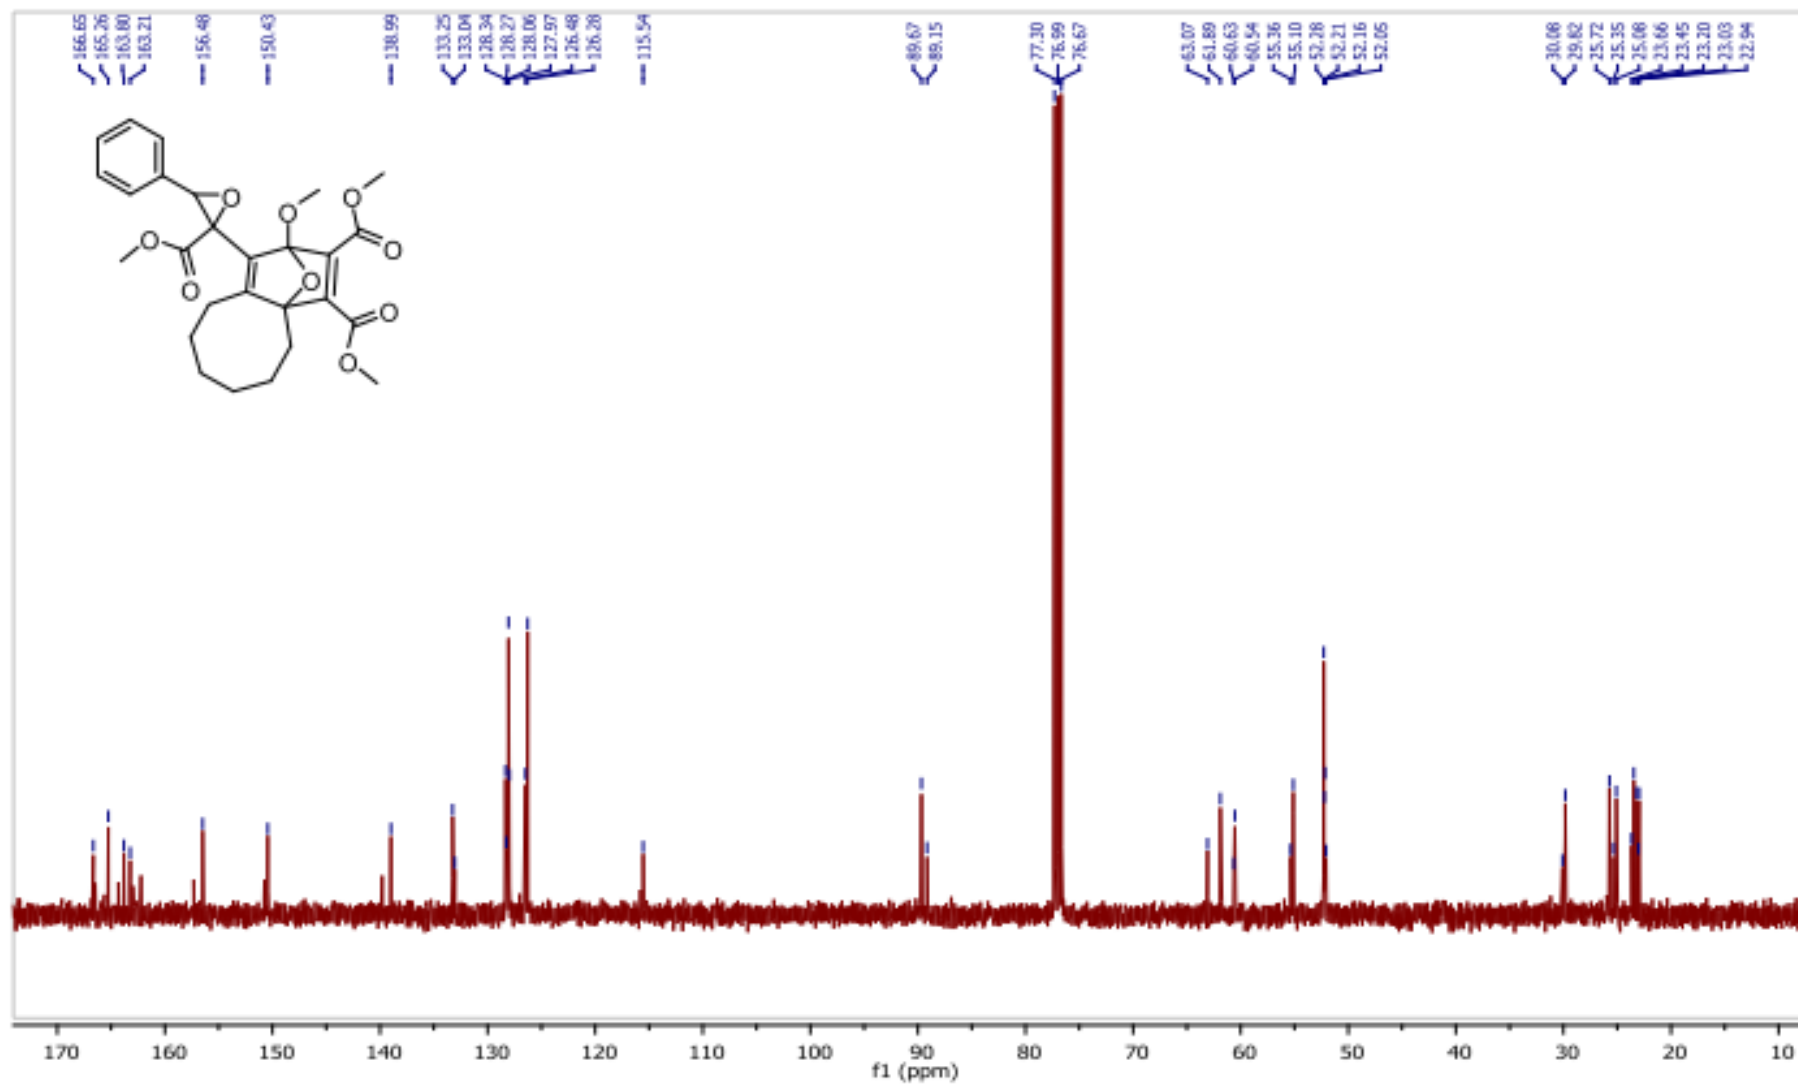

Figure S26. IR spectrum of **6b**.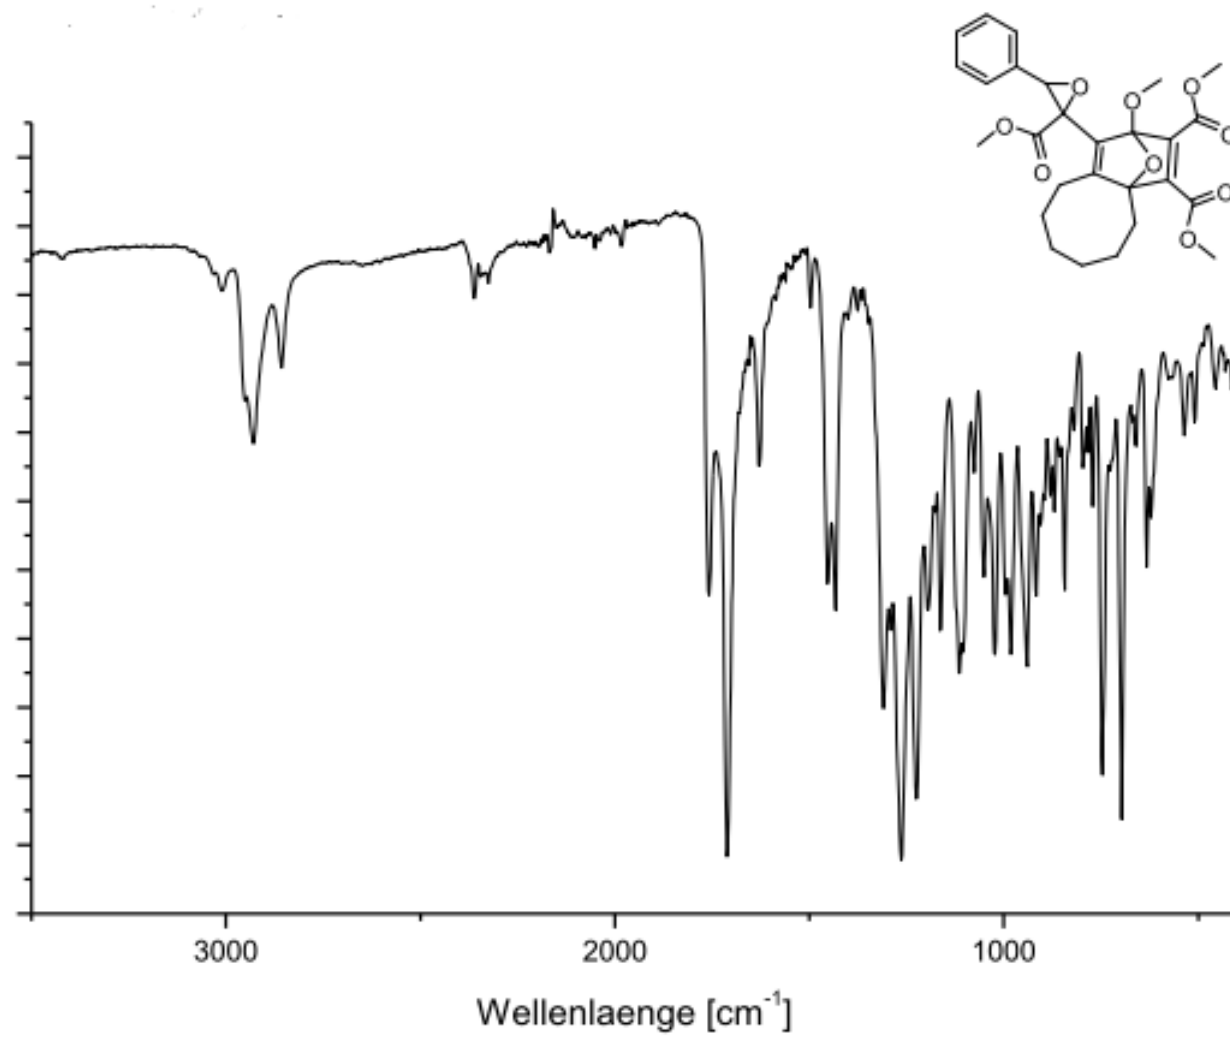

Figure S27.  $^1\text{H-NMR}$  spectrum of 7.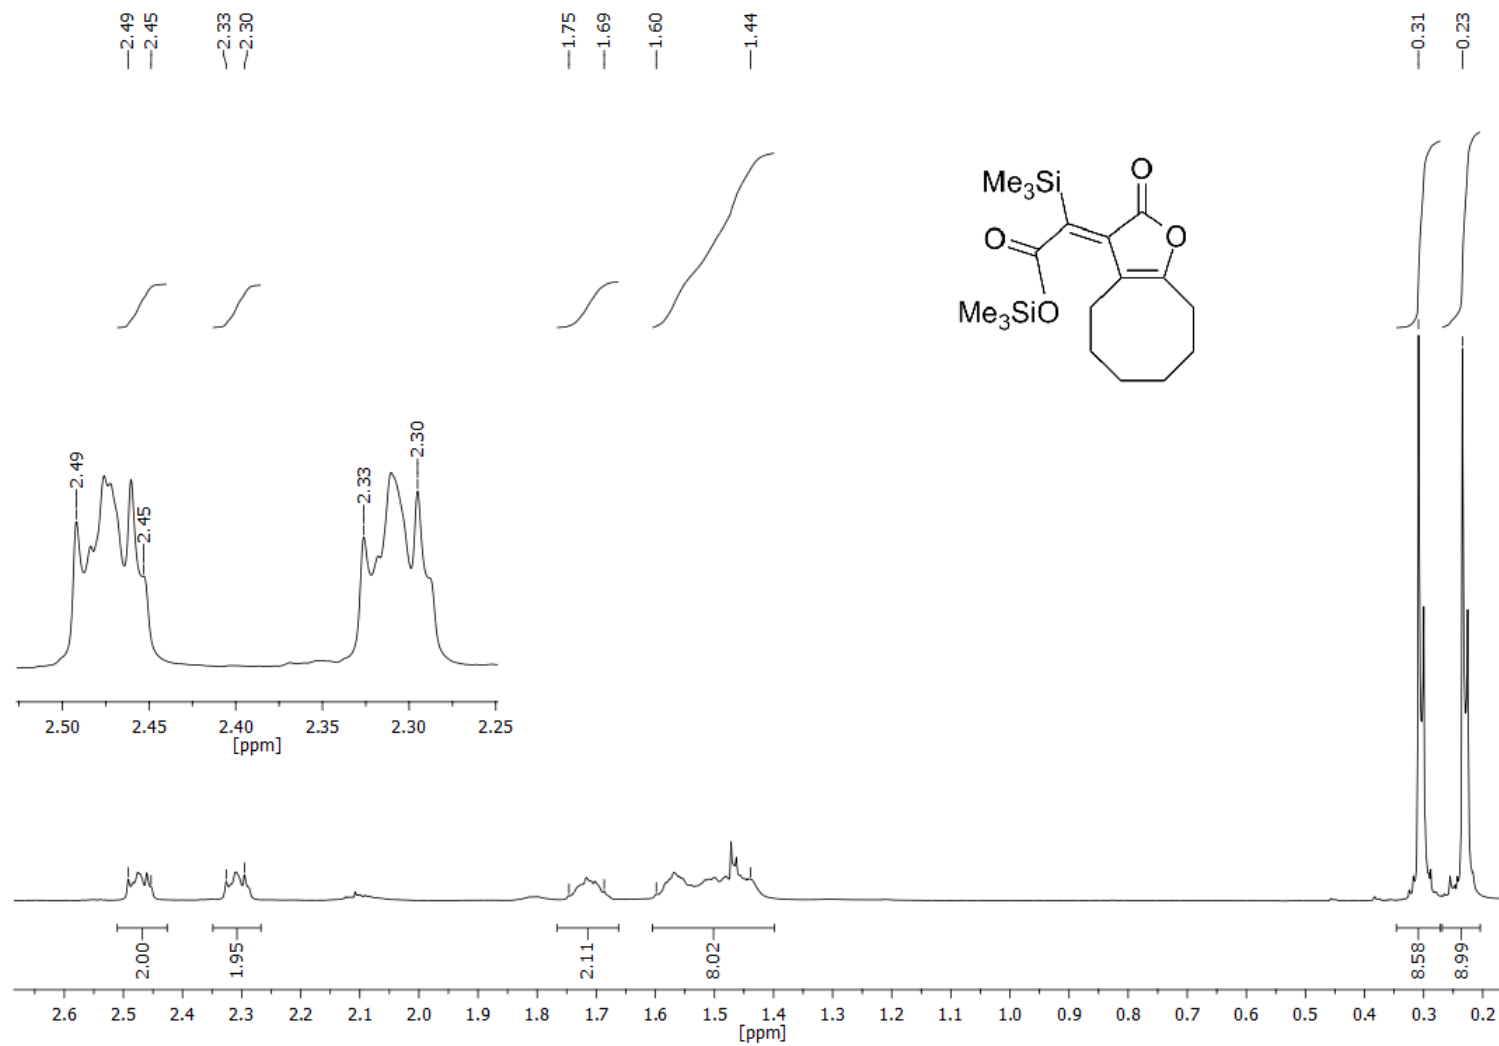

Figure S28.  $^{13}\text{C}$  NMR spectrum of 7.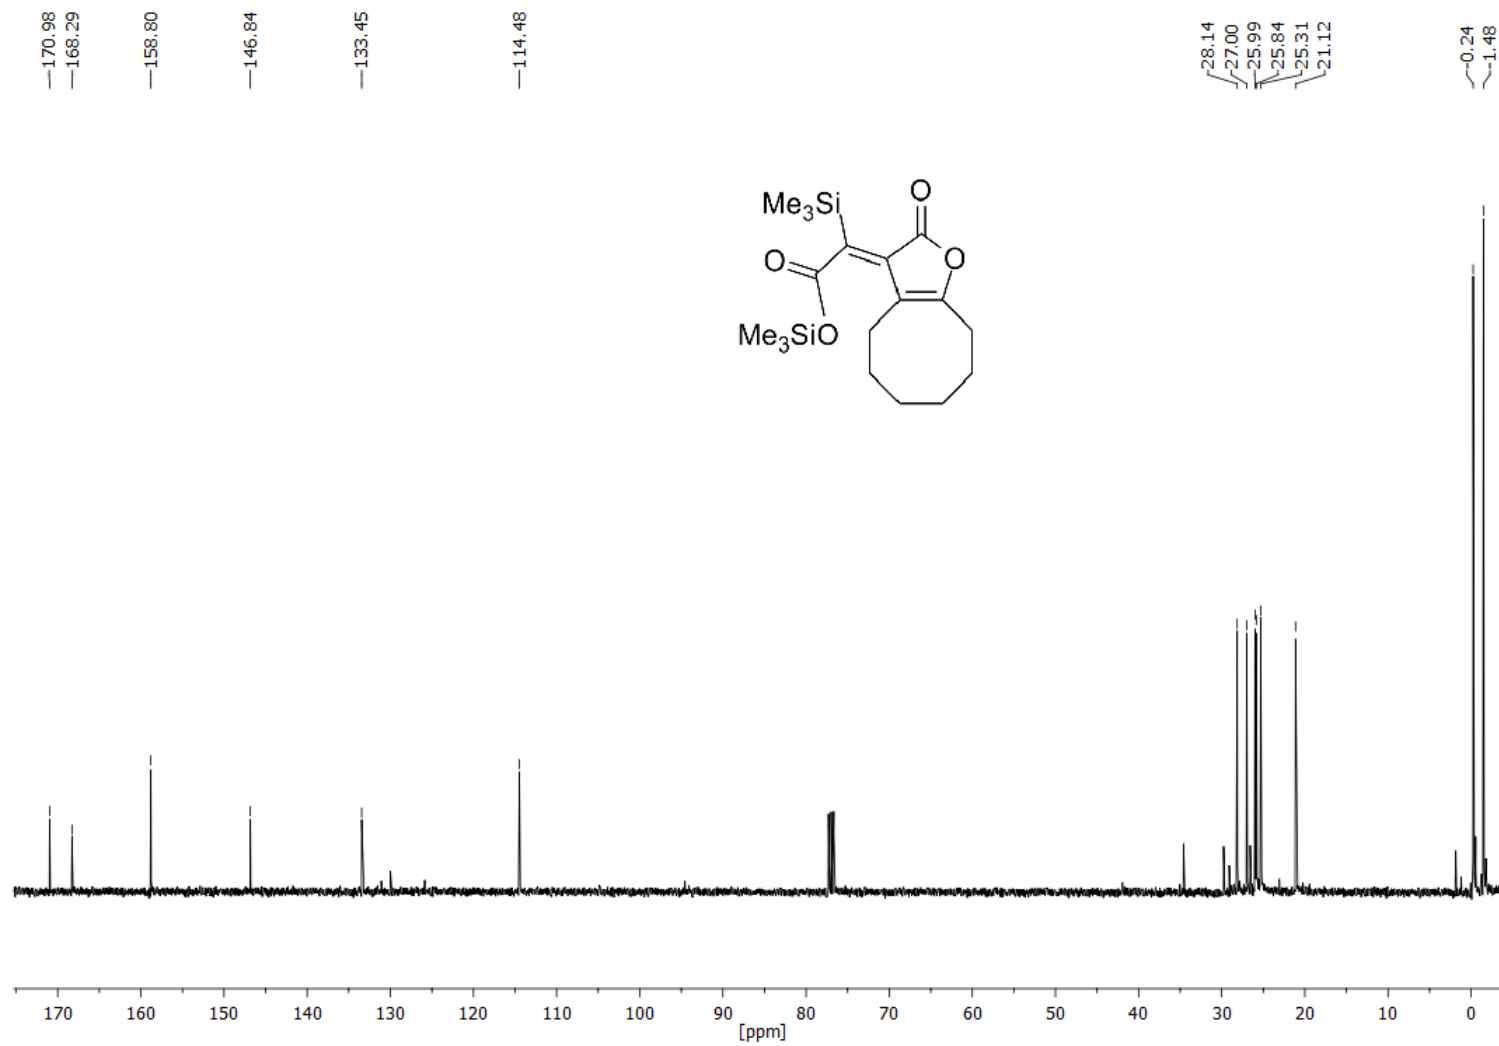

Figure S29. gHMBC-AC spectrum of 7.

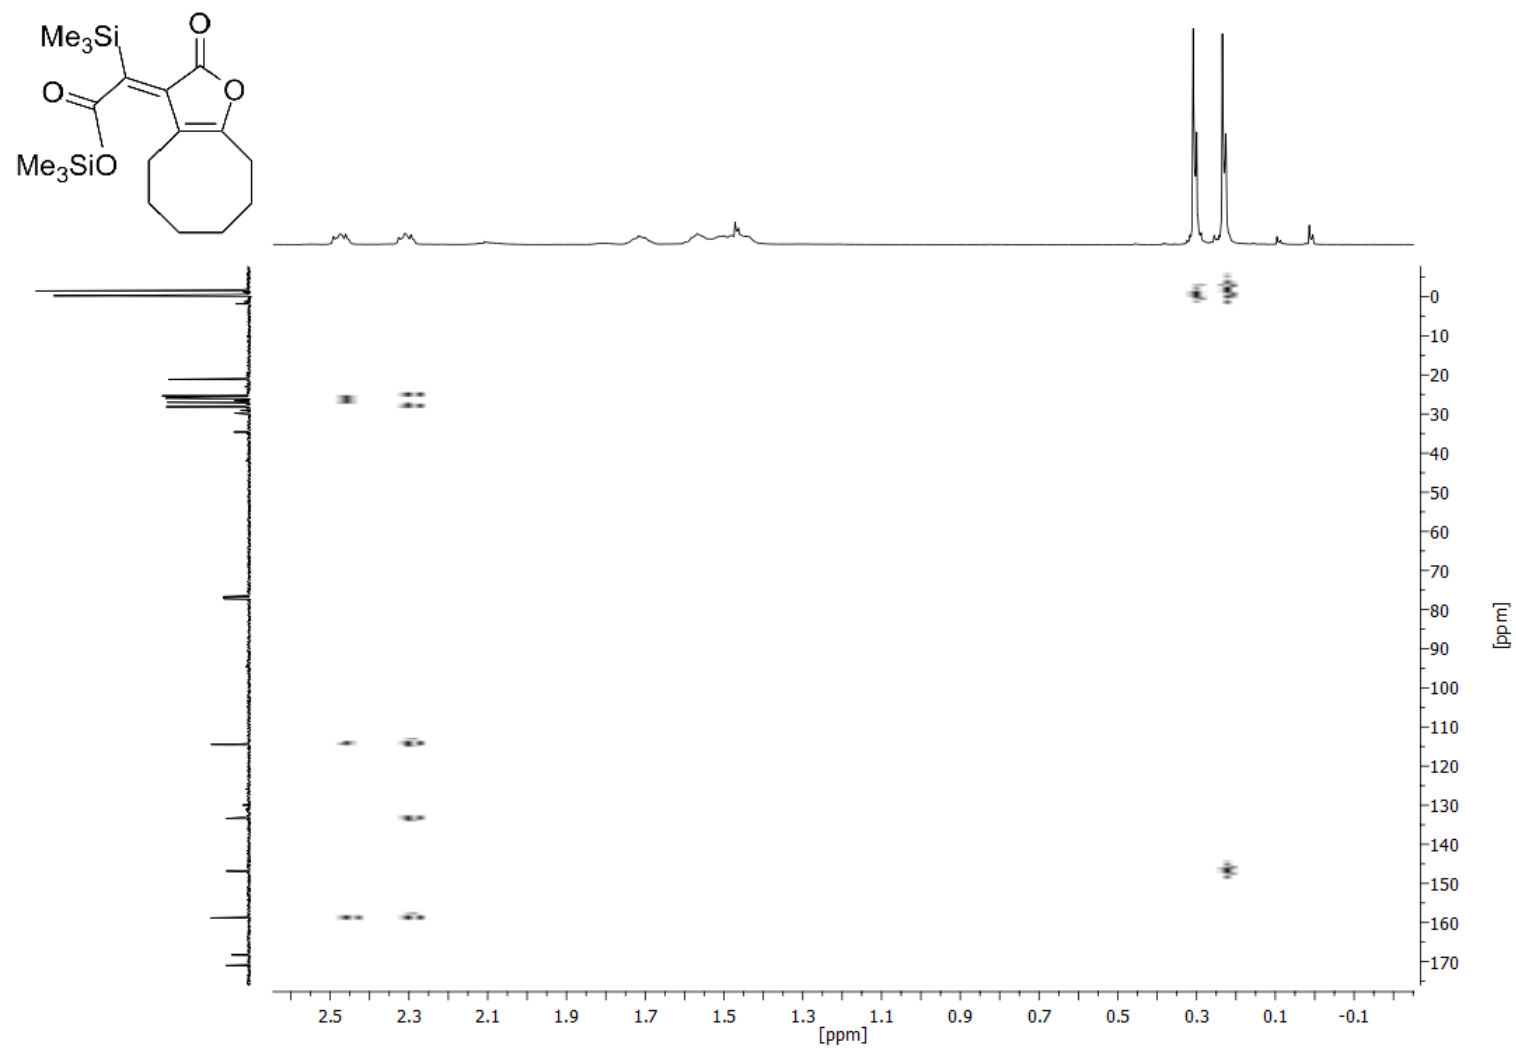

Figure S30. IR spectrum of 7.

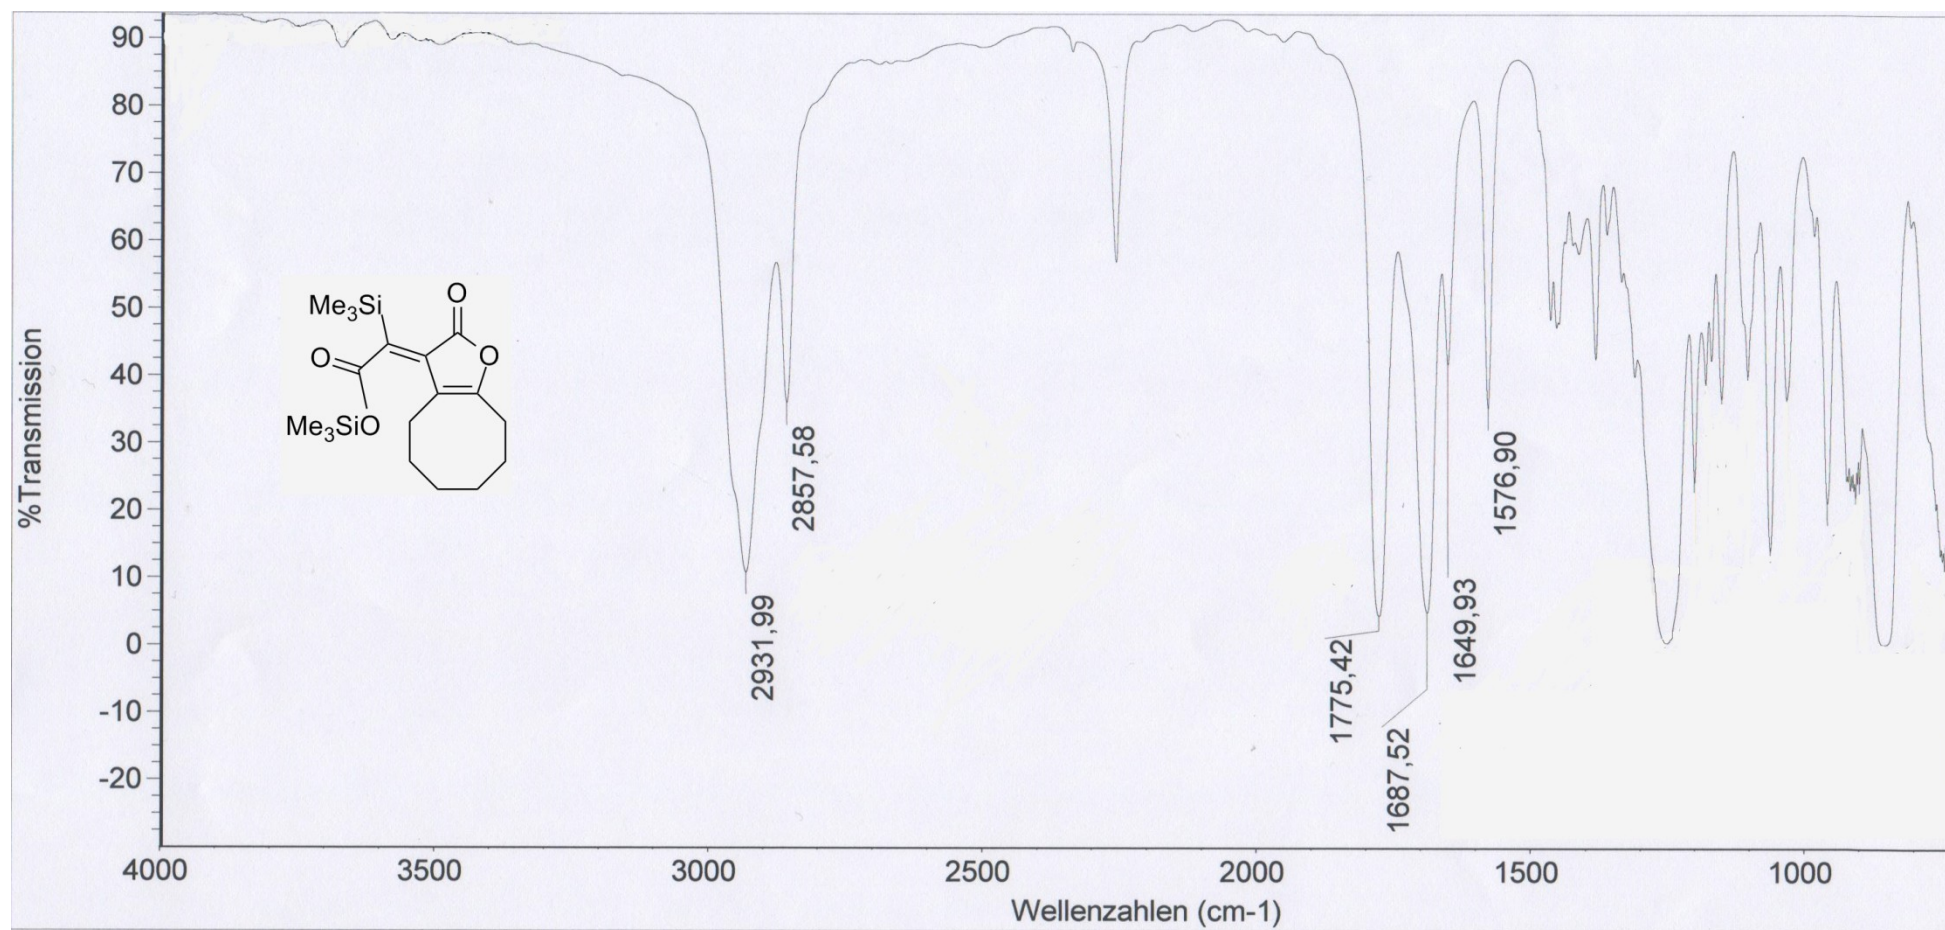



● **Alert level G**

|                   |                                                 |             |
|-------------------|-------------------------------------------------|-------------|
| PLAT005 ALERT 5 G | No _iucr_refine_instructions_details in the CIF | Please Do ! |
| PLAT793 ALERT 4 G | The Model has Chirality at C8 .....             | S Verify    |

0 **ALERT level A** = Most likely a serious problem - resolve or explain  
 0 **ALERT level B** = A potentially serious problem, consider carefully  
 0 **ALERT level C** = Check. Ensure it is not caused by an omission or oversight  
 2 **ALERT level G** = General information/check it is not something unexpected

0 ALERT type 1 CIF construction/syntax error, inconsistent or missing data  
 0 ALERT type 2 Indicator that the structure model may be wrong or deficient  
 0 ALERT type 3 Indicator that the structure quality may be low  
 1 ALERT type 4 Improvement, methodology, query or suggestion  
 1 ALERT type 5 Informative message, check

It is advisable to attempt to resolve as many as possible of the alerts in all categories. Often the minor alerts point to easily fixed oversights, errors and omissions in your CIF or refinement strategy, so attention to these fine details can be worthwhile. In order to resolve some of the more serious problems it may be necessary to carry out additional measurements or structure refinements. However, the purpose of your study may justify the reported deviations and the more serious of these should normally be commented upon in the discussion or experimental section of a paper or in the "special\_details" fields of the CIF. checkCIF was carefully designed to identify outliers and unusual parameters, but every test has its limitations and alerts that are not important in a particular case may appear. Conversely, the absence of alerts does not guarantee there are no aspects of the results needing attention. It is up to the individual to critically assess their own results and, if necessary, seek expert advice.

### **Publication of your CIF in IUCr journals**

A basic structural check has been run on your CIF. These basic checks will be run on all CIFs submitted for publication in IUCr journals (*Acta Crystallographica*, *Journal of Applied Crystallography*, *Journal of Synchrotron Radiation*); however, if you intend to submit to *Acta Crystallographica Section C* or *E*, you should make sure that full publication checks are run on the final version of your CIF prior to submission.

### **Publication of your CIF in other journals**

Please refer to the *Notes for Authors* of the relevant journal for any special instructions relating to CIF submission.

**PLATON version of 24/07/2014; check.def file version of 24/07/2014**



Datablock ihle01 - ellipsoid plot

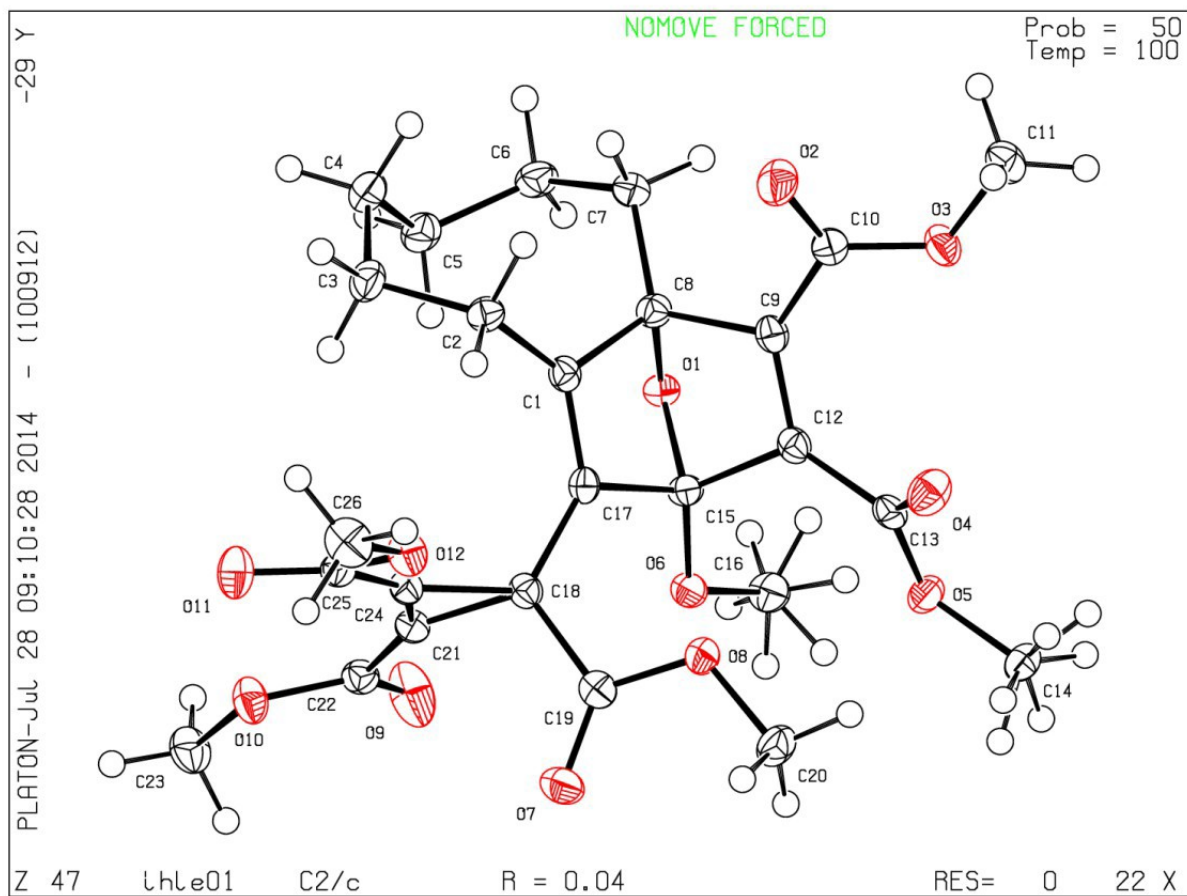

3b

## checkCIF/PLATON report

Structure factors have been supplied for datablock(s) shelx

THIS REPORT IS FOR GUIDANCE ONLY. IF USED AS PART OF A REVIEW PROCEDURE FOR PUBLICATION, IT SHOULD NOT REPLACE THE EXPERTISE OF AN EXPERIENCED CRYSTALLOGRAPHIC REFEREE.

No syntax errors found. [CIF dictionary](#) [Interpreting this report](#)

### Datablock: shelx

---

|                        |                |                    |               |
|------------------------|----------------|--------------------|---------------|
| Bond precision:        | C-C = 0.0027 A | Wavelength=1.54184 |               |
| Cell:                  | a=18.1382 (3)  | b=11.3690 (2)      | c=15.9193 (4) |
|                        | alpha=90       | beta=118.261 (2)   | gamma=90      |
| Temperature:           | 110 K          |                    |               |
|                        | Calculated     | Reported           |               |
| Volume                 | 2891.46 (11)   | 2891.44 (12)       |               |
| Space group            | I 2/a          | I 2/a              |               |
| Hall group             | -I 2ya         | -I 2ya             |               |
| Moiety formula         | C15 H22 O5     | C15 H22 O5         |               |
| Sum formula            | C15 H22 O5     | C15 H22 O5         |               |
| Mr                     | 282.33         | 282.32             |               |
| Dx, g cm <sup>-3</sup> | 1.297          | 1.297              |               |
| Z                      | 8              | 8                  |               |
| Mu (mm <sup>-1</sup> ) | 0.798          | 0.798              |               |
| F000                   | 1216.0         | 1216.0             |               |
| F000'                  | 1220.01        |                    |               |
| h, k, lmax             | 20, 12, 18     | 20, 13, 18         |               |
| Nref                   | 2263           | 2243               |               |
| Tmin, Tmax             | 0.852, 0.887   | 0.933, 1.000       |               |
| Tmin'                  | 0.852          |                    |               |

Correction method= MULTI-SCAN

Data completeness= 0.991                      Theta(max)= 61.986

R(reflections)= 0.0430 ( 2096)                      wR2(reflections)= 0.1190 ( 2243)

S = 1.033                                              Npar= 181

---

The following ALERTS were generated. Each ALERT has the format

**test-name\_ALERT\_alert-type\_alert-level.**

Click on the hyperlinks for more details of the test.

---

**Alert level B**

Crystal system given = monoclinic

THETM01 ALERT 3 B The value of  $\sin(\theta_{\max})/\text{wavelength}$  is less than 0.575  
 Calculated  $\sin(\theta_{\max})/\text{wavelength} = 0.5726$

**Alert level G**

PLAT128 ALERT 4 G Alternate Setting for Input Space Group I2/a C2/c Note

- 0 **ALERT level A** = Most likely a serious problem - resolve or explain  
 1 **ALERT level B** = A potentially serious problem, consider carefully  
 0 **ALERT level C** = Check. Ensure it is not caused by an omission or oversight  
 1 **ALERT level G** = General information/check it is not something unexpected
- 0 ALERT type 1 CIF construction/syntax error, inconsistent or missing data  
 0 ALERT type 2 Indicator that the structure model may be wrong or deficient  
 1 ALERT type 3 Indicator that the structure quality may be low  
 1 ALERT type 4 Improvement, methodology, query or suggestion  
 0 ALERT type 5 Informative message, check

It is advisable to attempt to resolve as many as possible of the alerts in all categories. Often the minor alerts point to easily fixed oversights, errors and omissions in your CIF or refinement strategy, so attention to these fine details can be worthwhile. In order to resolve some of the more serious problems it may be necessary to carry out additional measurements or structure refinements. However, the purpose of your study may justify the reported deviations and the more serious of these should normally be commented upon in the discussion or experimental section of a paper or in the "special\_details" fields of the CIF. checkCIF was carefully designed to identify outliers and unusual parameters, but every test has its limitations and alerts that are not important in a particular case may appear. Conversely, the absence of alerts does not guarantee there are no aspects of the results needing attention. It is up to the individual to critically assess their own results and, if necessary, seek expert advice.

**Publication of your CIF in IUCr journals**

A basic structural check has been run on your CIF. These basic checks will be run on all CIFs submitted for publication in IUCr journals (*Acta Crystallographica*, *Journal of Applied Crystallography*, *Journal of Synchrotron Radiation*); however, if you intend to submit to *Acta Crystallographica Section C* or *E*, you should make sure that **full publication checks** are run on the final version of your CIF prior to submission.

**Publication of your CIF in other journals**

Please refer to the *Notes for Authors* of the relevant journal for any special instructions relating to CIF submission.

**PLATON version of 24/07/2014; check.def file version of 24/07/2014**

Datablock shelx - ellipsoid plot

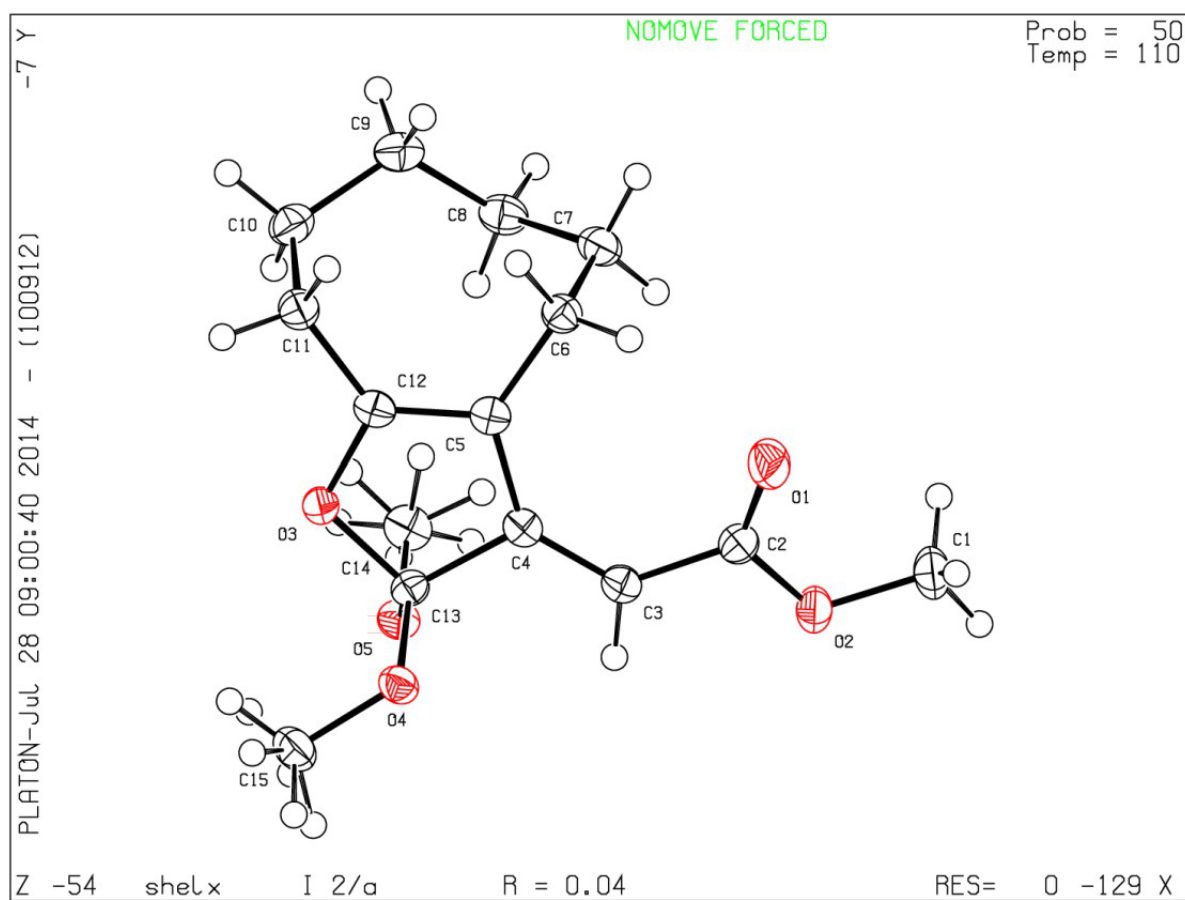

4a

**checkCIF/PLATON (standard)**

Structure factors have been supplied for datablock(s) shelxl

THIS REPORT IS FOR GUIDANCE ONLY. IF USED AS PART OF A REVIEW PROCEDURE FOR PUBLICATION, IT SHOULD NOT REPLACE THE EXPERTISE OF AN EXPERIENCED CRYSTALLOGRAPHIC REFEREE.

No syntax errors found.  
Please wait while processing ....[CIF dictionary](#)  
[Interpreting this report](#)**Datablock: shelxl**

|                                 |                                                 |                    |
|---------------------------------|-------------------------------------------------|--------------------|
| Bond precision:                 | C-C = 0.0041 Å                                  | Wavelength=1.54184 |
| Cell:                           | a=8.8577 (4)    b=28.5456 (16)    c=17.3589 (9) |                    |
|                                 | alpha=90    beta=90.063 (4)    gamma=90         |                    |
| Temperature: 100 K              |                                                 |                    |
|                                 | Calculated                                      | Reported           |
| Volume                          | 4389.2 (4)                                      | 4389.2 (4)         |
| Space group                     | P 21/c                                          | P 21/c             |
| Hall group                      | -P 2ybc                                         | ?                  |
| Moiety formula                  | C22 H28 O9                                      | C22 H28 O9         |
| Sum formula                     | C22 H28 O9                                      | C22 H28 O9         |
| Mr                              | 436.44                                          | 436.44             |
| Dx, g cm <sup>-3</sup>          | 1.321                                           | 1.321              |
| Z                               | 8                                               | 8                  |
| Mu (mm <sup>-1</sup> )          | 0.863                                           | 0.863              |
| F000                            | 1856.0                                          | 1856.0             |
| F000'                           | 1862.54                                         |                    |
| h, k, lmax                      | 10, 32, 19                                      | 10, 32, 19         |
| Nref                            | 6852                                            | 6811               |
| Tmin, Tmax                      | 0.902, 0.991                                    | 0.724, 0.991       |
| Tmin'                           | 0.708                                           |                    |
| Correction method= MULTI-SCAN   |                                                 |                    |
| Data completeness= 0.994        | Theta (max)= 61.770                             |                    |
| R (reflections)= 0.0548 ( 5141) | WR2 (reflections)= 0.1618 ( 6811)               |                    |
| S = 1.068                       | Npar= 559                                       |                    |

The following ALERTS were generated. Each ALERT has the format  
**test-name\_ALERT\_alert-type\_alert-level**.  
Click on the hyperlinks for more details of the test.

**Alert level B**

THETM01\_ALERT\_3\_B The value of sine(theta\_max)/wavelength is less than 0.575  
Calculated sin(theta\_max)/wavelength = 0.5714

**Alert level C**

PLAT340\_ALERT\_3\_C Low Bond Precision on C-C Bonds ..... 0.0041 Ang.  
PLAT413\_ALERT\_2\_C Short Inter XH3 .. XHn H35B .. H44A .. 2.11 Ang.

**Alert level G**

PLAT005\_ALERT\_5\_G No \_iucr\_refine\_instructions\_details in the CIF Please Do !  
PLAT793\_ALERT\_4\_G The Model has Chirality at C1 ..... R Verify  
**And 6 other PLAT793 Alerts**  
More ...

0 **ALERT level A** = Most likely a serious problem - resolve or explain  
1 **ALERT level B** = A potentially serious problem, consider carefully  
2 **ALERT level C** = Check. Ensure it is not caused by an omission or oversight  
8 **ALERT level G** = General information/check it is not something unexpected

0 ALERT type 1 CIF construction/syntax error, inconsistent or missing data  
1 ALERT type 2 Indicator that the structure model may be wrong or deficient  
2 ALERT type 3 Indicator that the structure quality may be low  
7 ALERT type 4 Improvement, methodology, query or suggestion  
1 ALERT type 5 Informative message, check

It is advisable to attempt to resolve as many as possible of the alerts in all categories. Often the minor alerts point to easily fixed oversights, errors and omissions in your CIF or refinement strategy, so attention to these fine details can be worthwhile. In order to resolve some of the more serious problems it may be necessary to carry out

29.7.2014

checkCIF/PLATON (standard)

additional measurements or structure refinements. However, the purpose of your study may justify the reported deviations and the more serious of these should normally be commented upon in the discussion or experimental section of a paper or in the "special\_details" fields of the CIF. checkCIF was carefully designed to identify outliers and unusual parameters, but every test has its limitations and alerts that are not important in a particular case may appear. Conversely, the absence of alerts does not guarantee there are no aspects of the results needing attention. It is up to the individual to critically assess their own results and, if necessary, seek expert advice.

#### Publication of your CIF in IUCr journals

A basic structural check has been run on your CIF. These basic checks will be run on all CIFs submitted for publication in IUCr journals (*Acta Crystallographica*, *Journal of Applied Crystallography*, *Journal of Synchrotron Radiation*); however, if you intend to submit to *Acta Crystallographica Section C* or *E*, you should make sure that full publication checks are run on the final version of your CIF prior to submission.

#### Publication of your CIF in other journals

Please refer to the *Notes for Authors* of the relevant journal for any special instructions relating to CIF submission.

PLATON version of 24/07/2014; check.def file version of 24/07/2014

### Datablock shelxl - ellipsoid plot

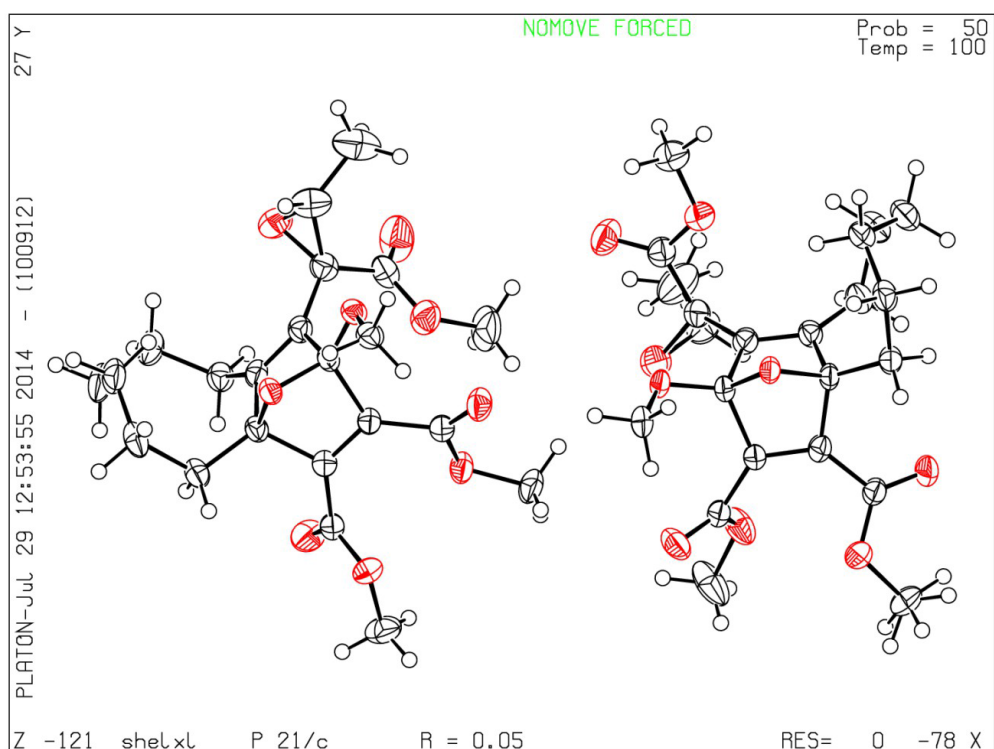

**Figure S31.** X-ray with atom labeling of **3b**.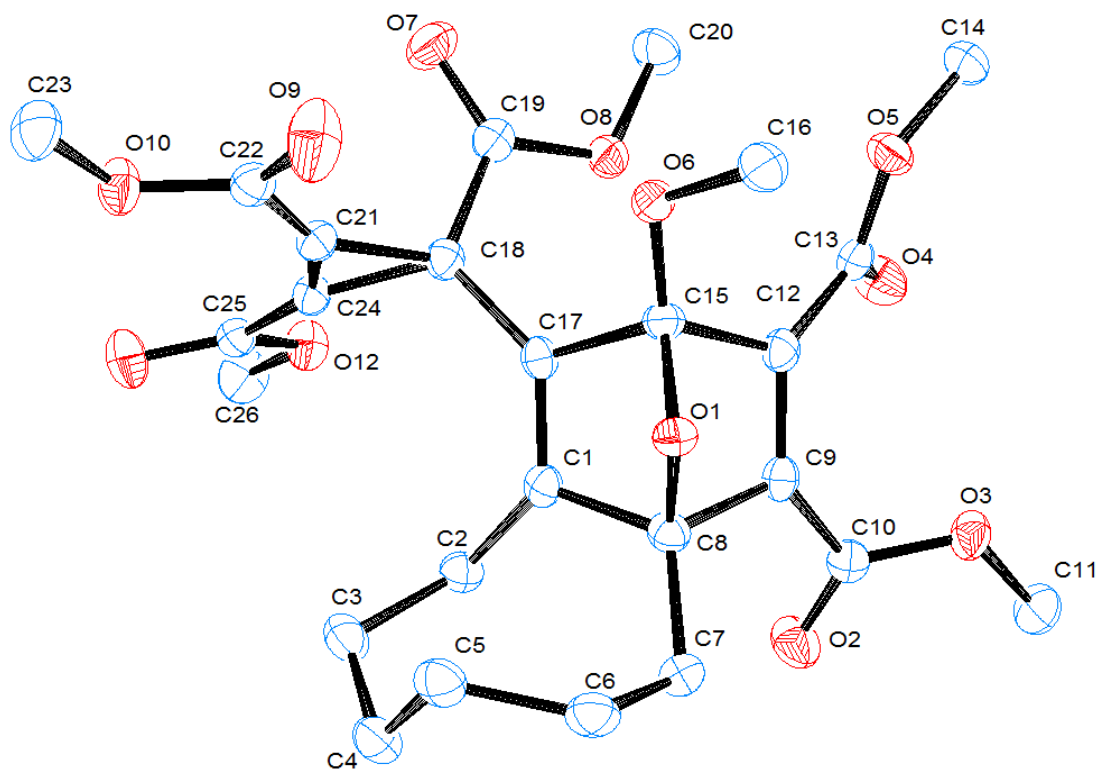**Figure S32.** X-ray with atom labeling of **4a**.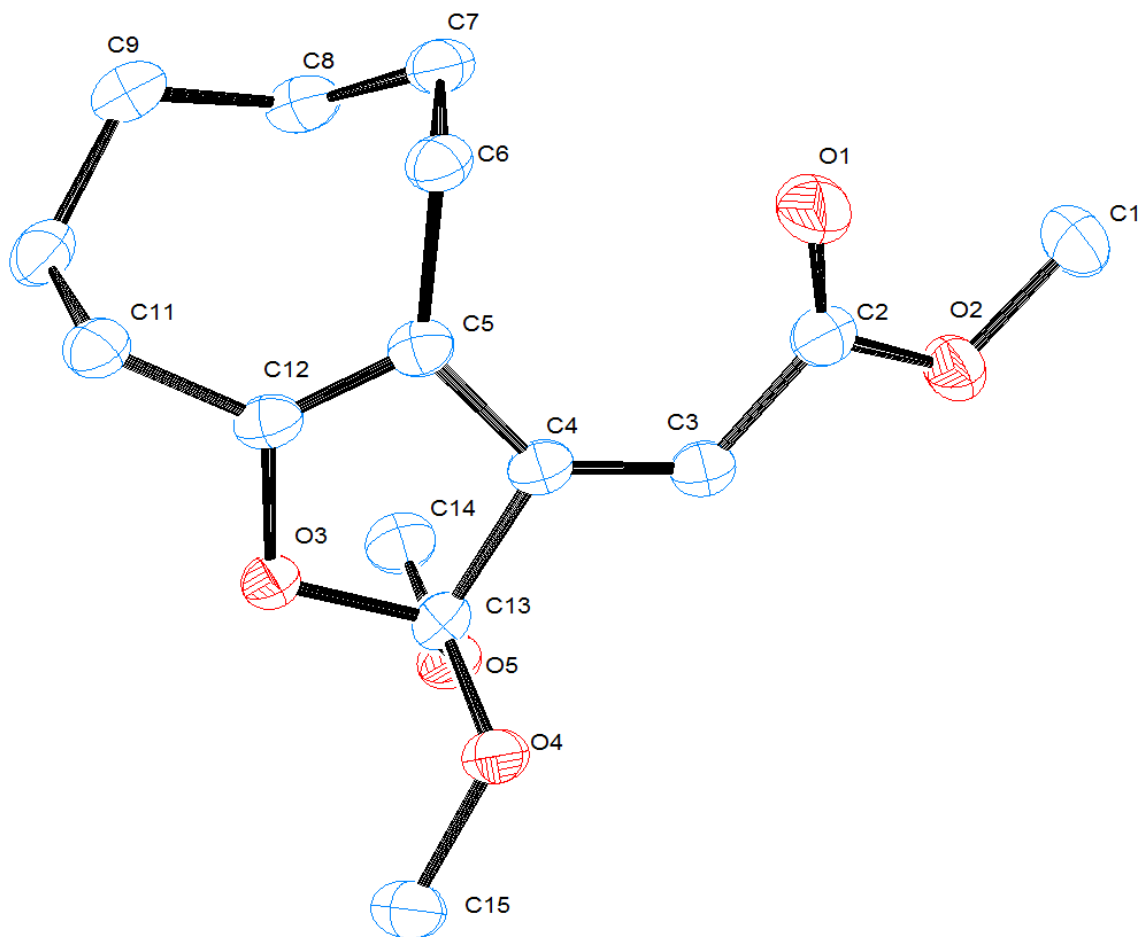

Figure S33. X-ray with atom labeling of 6a.

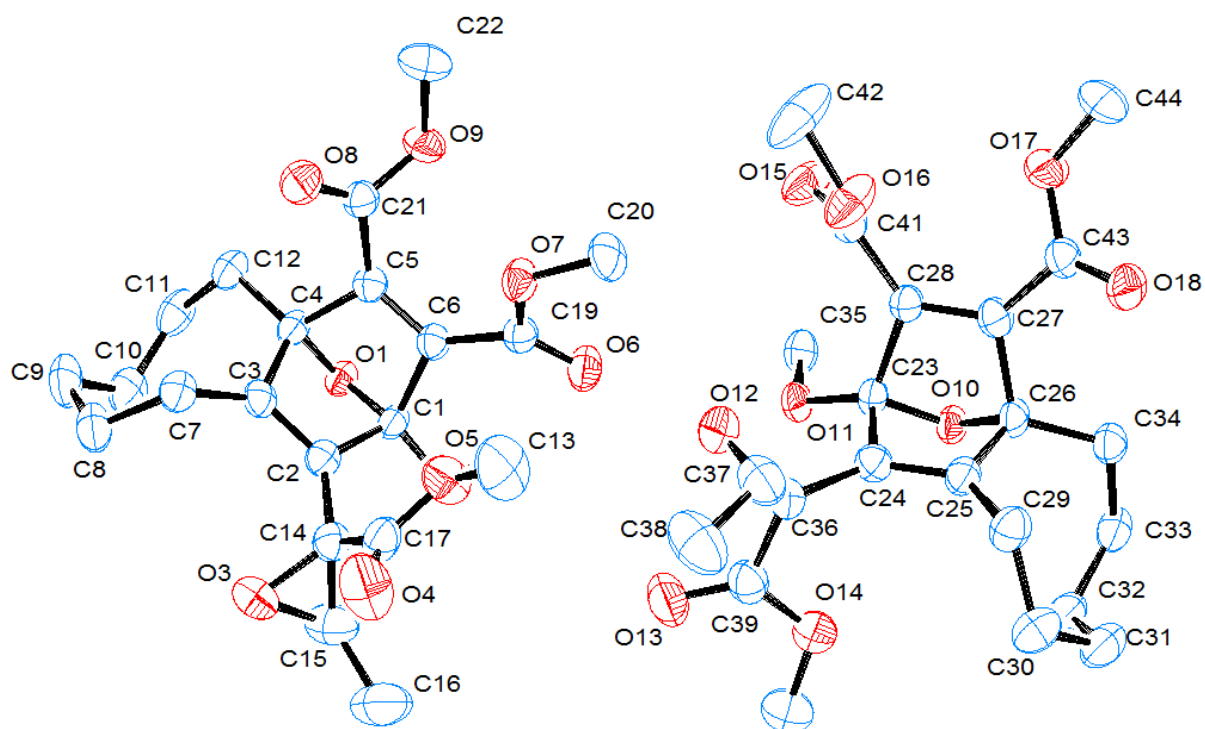

Supplement: s1 [file s1]
